## Coil-to-Helix Transition at the Nup358-BicD2 Interface for Dynein Recruitment and Activation

James M. Gibson<sup>1§</sup>, Heying Cui<sup>§2</sup>, M. Yusuf Ali<sup>3§</sup>, Xiaoxin Zhao<sup>2</sup>, Erik W. Debler<sup>4</sup>, Jing Zhao<sup>1,5</sup>, Kathleen M. Trybus<sup>3\*</sup>, Sozanne R. Solmaz<sup>2\*</sup> and Chunyu Wang<sup>1\*</sup>

<sup>1</sup>Department of Biological Sciences, Department of Chemistry and Chemical Biology, Center for Biotechnology and Interdisciplinary Studies, Rensselaer Polytechnic Institute, 110 8<sup>th</sup> Street, Troy NY 12180.

<sup>2</sup>Department of Chemistry, Binghamton University, P.O. Box 6000, Binghamton, NY 13902.

<sup>3</sup>Department of Molecular Physiology and Biophysics, University of Vermont, Burlington, Vermont.

<sup>4</sup>Department of Biochemistry & Molecular Biology, Thomas Jefferson University, 1020 Locust Street, Philadelphia, PA 19107.

<sup>5</sup>Present address: College of Food Science and Nutritional Engineering, China Agricultural University, Beijing, China.

§ co-first authors

\*corresponding authors:

SRS: Department of Chemistry, Binghamton University, P.O. Box 6000, Binghamton, NY 13902. E-mail: [ssolmaz@binghamton.edu](mailto:ssolmaz@binghamton.edu). Phone: +1 607 777 2089

CW: Department of Biological Sciences, Department of Chemistry and Chemical Biology, Center for Biotechnology and Interdisciplinary Studies, Rensselaer Polytechnic Institute, 110 8<sup>th</sup> Street, Troy NY 12180. E-mail: [wangc5@rpi.edu](mailto:wangc5@rpi.edu). Phone: 518 276 3497

KMT: Department of Molecular Physiology and Biophysics, University of Vermont, Burlington, Vermont. E-mail: [Kathleen.Trybus@med.uvm.edu](mailto:Kathleen.Trybus@med.uvm.edu). Phone: 802-656-8750

|        |                           |
|--------|---------------------------|
| Gibson | ORCID 0000-0002-9378-0135 |
| Trybus | ORCID 0000-0002-5583-8500 |
| Wang   | ORCID 0000-0001-5165-7959 |
| Solmaz | ORCID 0000-0002-1703-3701 |
| Ali    | ORCID 0000-0003-2164-3323 |
| Cui    | ORCID 0000-0002-7244-9670 |
| Debler | ORCID 0000-0002-2587-2150 |
| Zhao   | ORCID 0000-0002-5030-3929 |

## Abstract

Nup358, a nuclear pore protein, facilitates a nuclear positioning pathway that is essential for brain development. Nup358 binds and activates the auto-inhibited dynein adaptor Bicaudal D2 (BicD2), which in turn recruits and activates the dynein machinery to position the nucleus. The molecular details of the Nup358/BicD2 interaction remain poorly understood. Here, we show that a minimal dimerized Nup358 domain activates dynein/dynactin/BicD2 for processive motility on microtubules. Using nuclear magnetic resonance (NMR) titration and chemical exchange saturation transfer (CEST), a Nup358-helix encompassing residues 2162-2184 was identified, which transitioned from random coil to an  $\alpha$ -helix upon BicD2-binding and formed the core of the Nup358-BicD2 interface. Mutations in this region of Nup358 decreased the Nup358/BicD2 interaction, resulting in decreased dynein recruitment and impaired motility. BicD2 thus recognizes the cargo adaptor Nup358 through a “cargo recognition  $\alpha$ -helix”, a structural feature that may stabilize BicD2 in its activated state, promoting activation of dynein motility.

## Introduction

Cytoplasmic dynein is the predominant motor responsible for minus-end directed traffic on microtubules<sup>1</sup> and facilitates a vast number of transport events that are critical for chromosome segregation, signal transmission at synapses, and brain and muscle development<sup>2–16</sup>. Integral to the transport machinery are *dynein adaptors*, such as Bicaudal D2 (BicD2), whose N-terminal region (BicD2<sup>CC1</sup>) recruits and activates dynein-dynactin for processive motility<sup>17–27</sup>. Also integral to the dynein transport machinery are *cargo adaptors*, which bind to the C-terminal domain (CTD) of BicD2<sup>28</sup>. Cargo-adapters are required to activate BicD2 for dynein binding, which is a key regulatory step for dynein-dependent transport<sup>17–20,22–27,29,30</sup>. In the absence of cargo adapter/dynein adapter complexes such as Nup358/BicD2, dynein and dynactin are autoinhibited and only show diffusive motion on microtubules. Furthermore, in the absence of cargo adapters, BicD2 assumes a looped, auto-inhibited conformation, in which its N-terminal dynein/dynactin binding site is masked by the CTD and remains inaccessible. The CTD is required for auto-inhibition, as a truncated BicD2 without it activates dynein/dynactin for processive motility. Binding of dynein adaptors/cargo to the CTD releases auto-inhibition, likely resulting in an extended conformation that recruits dynein and dynactin<sup>17–20,22–27,29,30</sup>. The crystal structures of the C-terminal cargo recognition domains of three BicD2 homologs have been determined<sup>26,31,32</sup>; However, the structural mechanisms of BicD2-mediated cargo recognition and dynein activation still remain poorly understood.

The cargo adaptors for human BicD2 include Nup358<sup>11</sup>, Rab6<sup>GTP</sup><sup>28</sup> and nesprin 2-G<sup>6</sup>. Nup358, also known as RanBP2, is a 358 kDa nuclear pore complex protein with multiple functions<sup>33</sup>. During G2 phase, Nup358 engages in a pathway for positioning of the nucleus relative to the centrosome along microtubules by binding to BicD2, which in turn recruits dynein and dynactin (Fig. 1)<sup>11</sup>. This pathway is essential for apical nuclear migration during differentiation of radial glial progenitor cells, which give rise to the majority of neurons and glia cells of the neocortex<sup>4,5</sup>. A second nuclear positioning pathway is facilitated by BicD2/dynein and nesprin 2-G<sup>6</sup>, a component of LINC (Linker of Nucleoskeleton and Cytoskeleton) complexes (LINC)<sup>34</sup>, which is important for migration of postmitotic neurons during brain development<sup>6</sup>. Finally, Rab6<sup>GTP</sup> recruits BicD2/dynein for the transport of Golgi-derived secretory vesicles<sup>28,35</sup>. Thus, BicD2 plays important roles in faithful chromosome segregation, neurotransmission at synapses as well as brain and muscle development<sup>5,6,8,11,28,36</sup>. Mutations in BicD2 cause neuromuscular diseases including a subset of cases of spinal muscular atrophy<sup>37–40</sup>, the most common genetic cause of death in infants<sup>41</sup>. Within the Nup358 sequence, there are many intrinsically disordered regions (IDR), commonly found in dynein adaptors, cargo adapters, dynein and other factors involved in dynein-dependent transport<sup>10,42–44</sup>.

Although IDRs and IDPs (intrinsically disordered protein) make up ~30% of eukaryotic proteins and have important physiological functions<sup>45</sup>, they remain the most poorly characterized class of protein in their structure, dynamics and interactions. An example of IDR is a region in the dynein light intermediate chain 1 (LIC1), which forms a 15-residue  $\alpha$ -helix to interact with the N-terminal domain of BicD2, an important step in the activation of dynein for processive motility<sup>42,43,46</sup>. Because of the small binding domain located in an IDR, in some cases this type of interactions can associate and dissociate at a quick rate while maintaining a

high degree of specificity and affinity<sup>47</sup>, making them uniquely suited for transport processes. In addition to the interaction between LIC1 and BicD2, a very large interface is formed between the N-terminal coiled coil of BicD2, the dynein tail and dynactin, which promotes activation of dynein for processive motility<sup>17,18,22,29,48</sup>.

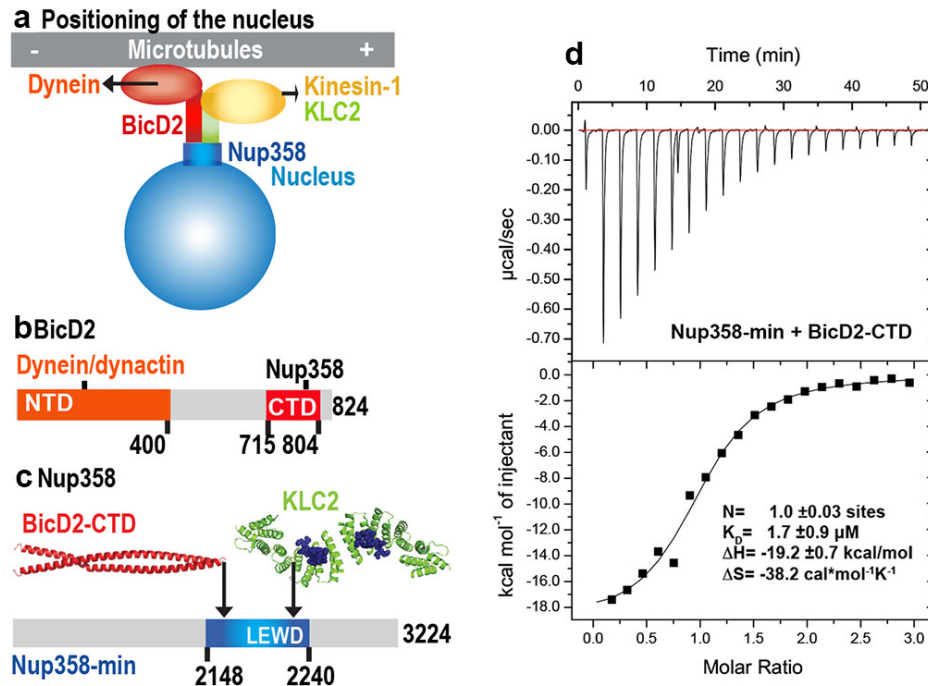

**Fig. 1. (a) Nup358 interacts with both BicD2/dynein/dynactin and kinesin-1** (via kinesin-1 light chain 2, KLC2) to mediate bi-directional nuclear positioning in G2 phase of the cell cycle<sup>11,49,50</sup>. This pathway is essential for a fundamental process in brain development that is required for radial glial progenitor cells to differentiate to the majority of neurons and glia cells of the neocortex<sup>4</sup>. (b,c) Schematic representation of the expression constructs BicD2-CTD (b, red) and Nup358-min (c, blue), in the context of the full-length proteins. KLC2 is recruited to Nup358 via a W-acidic motif with the sequence motif LEWD<sup>50</sup>. The X-ray structures of the TPR domain of the KLC2 (green, referred to as KLC2 hereafter), fused to a LEWD sequence motif (purple)<sup>53</sup> and the X-ray structure of the BicD2-CTD (red)<sup>32</sup> are shown in cartoon representation in c. (d) The ITC thermogram of Nup358-min and BicD2-CTD is shown, from which the affinity (dissociation constant  $K_D$ ) was determined to be  $1.7 \pm 0.9 \mu\text{M}$ . N: number of sites;  $\Delta S$ : the change in entropy;  $\Delta H$ : the change in enthalpy. In Fig. S1, the affinity of Nup358-min-GST (i.e., with the GST-tag intact) and BicD2-CTD was determined by ITC to be  $1.6 \pm 0.3 \mu\text{M}$ .

In addition to binding to BicD2, Nup358 also recruits the opposite polarity motor kinesin-1 via the subunit kinesin-1 light chain 2 (KLC2) which binds to a W-acidic motif with the sequence LEWD<sup>49-51</sup>. While dynein is the predominant motor in G2 phase, kinesin-1 is actively involved in nucleus positioning in G2 phase and modulating overall motility<sup>11</sup>. Bidirectional transport as observed for the nucleus is common and is also displayed by mitochondria, endosomes, viruses, phagosomes, secretory vesicles, and many vesicles in neuronal axons and growth cones<sup>2,3,6,9-16,52</sup>. Opposite polarity motors often bind in close spatial proximity to cargo adapters, but it is unknown how their overall motility is regulated.

Here we have determined the structural properties of the interface of a minimal Nup358/BicD2 complex by an interdisciplinary approach that combines NMR spectroscopy, X-ray crystallography, mutagenesis, circular dichroism spectroscopy and small-angle X-ray scattering. This work is further enhanced by single-molecule binding and processivity assays which confirm the results obtained from the minimal complex in the context of intact dynein/dynactin/BicD2 motors and provide mechanistic insights into dynein activation. These results establish a structural basis for cargo recognition and suggest that Nup358 interacts with BicD2 through a “cargo recognition”  $\alpha$ -helix. Single-molecule assays show that a minimal dimerized Nup358 construct is sufficient to activate dynein/dynactin/BicD2 for processive motility, and single molecule binding assays show that dynein-dynactin enhances the formation of the Nup358/BicD2 complex, thus providing mechanistic insights into dynein activation. Intriguingly, our NMR data also show that the binding site of BicD2 in Nup358 is spatially close to but does not overlap with the LEWD motif that acts as a kinesin-1 light chain 2 (KLC2) binding site, suggesting that kinesin and dynein machineries may interact directly through Nup358.

## Results:

### ITC establishes a minimal complex for Nup358/BicD2 interaction

Previously, we have determined an X-ray structure of the C-terminal domain of human BicD2 (BicD2-CTD, residues 715-804), which contains the binding sites for cargoes, including human Nup358 (Fig. 1 b)<sup>32</sup>. A minimal complex was reconstituted with BicD2-CTD and a minimal fragment of human Nup358 containing residues 2148-2240, which is called Nup358-min<sup>32,50</sup> (Fig. 1 c). Here, the affinity of the BicD2-CTD towards Nup358-min was determined by isothermal titration calorimetry (ITC) (Fig. 1 d). The ITC thermogram fits well to a one-site binding model (number of sites  $N = 1.0$ ) and is thus consistent with a molar ratio of [Nup358]/[BicD2] of 1. This molar ratio is in agreement with our previously published molar masses obtained from size exclusion chromatography coupled to multi-angle light scattering (SEC-MALS), which showed that Nup358 and BicD2 form a 2:2 complex<sup>54</sup>. The equilibrium dissociation constant  $K_D$  was determined to be  $1.7 \pm 0.9 \mu\text{M}$ , with the change of enthalpy of  $-19.2 \pm 0.7 \text{ kcal/mol}$  and the change of entropy  $-38.2 \text{ cal/mol/K}$ . Thus, the Nup358-BicD2 interaction is driven by a favorable enthalpy change, which overcomes the unfavorable entropy change.

We also performed an ITC-titration with Nup358-min-GST (i.e. with the GST-tag intact, whereas it was cleaved off in the first experiment) and the BicD2-CTD which yielded a very similar affinity of  $1.6 \pm 0.3 \mu\text{M}$  (Fig. S1). This is similar to the previously published affinity of  $0.4 \mu\text{M}$ , which we determined for the BicD2-CTD towards a larger fragment of Nup358 (residues 2006-2443, with the GST-tag intact)<sup>54</sup>. These ITC results confirm the mapped boundaries of the minimal binding site.

### Nup358<sup>min</sup> forms a dynein-dynactin-BicD2-Nup358 complex and activates processive motility

Single molecule reconstitutions were used to determine if Nup358<sup>min</sup> can bind and relieve BicD2 auto-inhibition, which in turn allows dynein-dynactin to be recruited and activated for processive motion. We first reconstituted a dynein-dynactin-BicD2-Nup358<sup>min</sup> (DDBN<sup>min</sup>) complex in which Nup358<sup>min</sup> and full-length BicD2 (BicD2) were labeled with two different color

Quantum dots (Qdots) and mixed with tissue purified unlabeled dynein-dynactin (DD) complex (Fig. 2a, but without microtubules). Only 24% dual-color complexes were observed for dynein-dynactin-BicD2-Nup358<sup>min</sup> (DDBN<sup>min</sup>) complex (Fig. S2a, c). We next reconstituted the complex with a Nup358<sup>min</sup> that was dimerized with a leucine zipper (hereafter called Nup358<sup>min-zip</sup>). The rationale for this strategy was based on our previous observation that dimerization of the *Drosophila* mRNA binding adapter protein Egalitarian with a leucine zipper enhanced its affinity for BicD and bypassed the requirement for mRNA cargo for BicD activation<sup>24</sup>. Similarly, Nup358<sup>min</sup> dimerization enhanced the number of dual-colored DDBN complexes to 36% (n=945) (Fig. S2a, b). Statistical analysis shows that a maximum of 50% dual-color complexes can be formed<sup>24,55</sup>. Based on these results, all further single molecule reconstitutions used the dimerized version of Nup358 (Nup358<sup>min-zip</sup>).

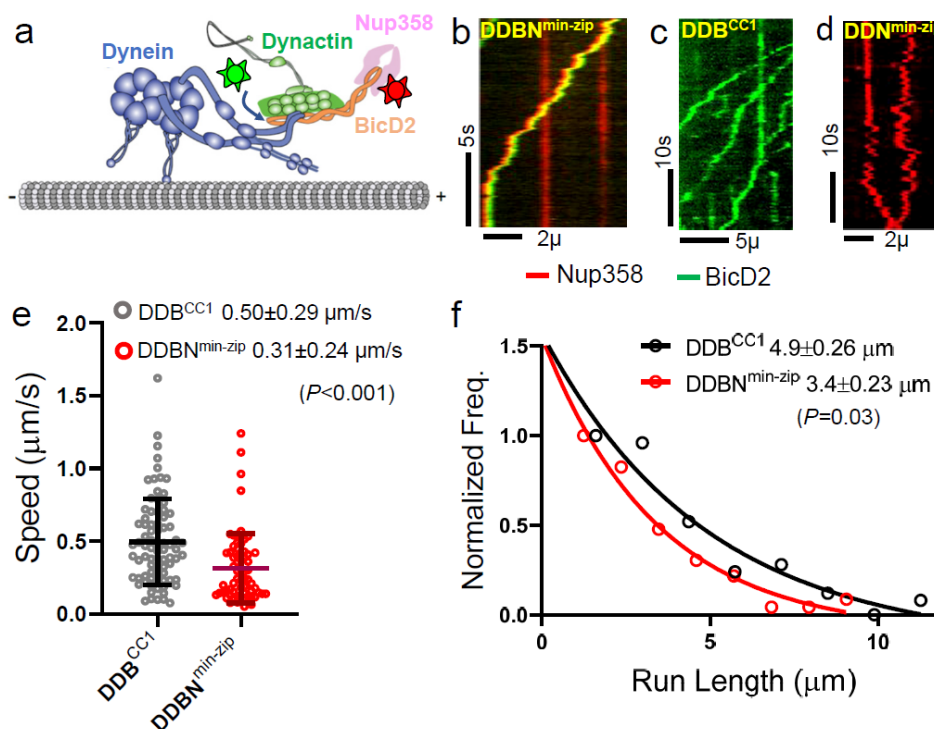

**Fig. 2. Nup358<sup>min</sup> is capable of forming a dynein-dynactin-BicD2-Nup358 complex that is fully activated for processive motility.** (a) Schematic of a dynein-dynactin-BicD2-Nup358<sup>min-zip</sup> (DDBN<sup>min-zip</sup>) complex bound to a microtubule. BicD2 and Nup358 were labeled with two different color Quantum dots (stars). (b) Kymograph of the DDBN<sup>min-zip</sup> complex moving processively on microtubules, with Nup358<sup>min-zip</sup> labeled with a 655 nm Qdot and BicD2 labeled with a 565 nm Qdot. (c) As a control, motion of dynein-dynactin in the presence of the N-terminal domain of BicD2 (BicD2<sup>CC1</sup>) was observed. BicD2<sup>CC1</sup> was labeled with a 565 nm Qdot. (d) Dynein-dynactin and Nup358 (DDN<sup>min-zip</sup>) showed diffusive movement on microtubules, with Nup358<sup>min-zip</sup> labeled with a 655 nm Qdot. (e, f) Speed and run length of DDBN<sup>min-zip</sup> (red) were compared with constitutively active complex DDB<sup>CC1</sup>. The speed and run length of DDB<sup>CC1</sup> are  $0.50 \pm 0.29 \mu\text{m/s}$  (N=80) and  $4.9 \pm 0.26 \mu\text{m}$  (N=80), compared with values of  $0.31 \pm 0.24 \mu\text{m/s}$  (N=68) and  $3.4 \pm 0.23 \mu\text{m}$  (N=68) for DDBN<sup>min-zip</sup>. Speeds for the two complexes are significantly different ( $p < 0.001$ , Unpaired t-test with Welch's correction), as are the run lengths ( $p = 0.03$ , Kolmogorov-Smirnov test).

The motion of the DDBN<sup>min-zip</sup> complex on microtubules was quantified (Fig. 2a). The DDBN<sup>min-zip</sup> complex exhibited robust processive motion on surface-immobilized MTs, implying that Nup358<sup>min-zip</sup> relieves BicD2 auto-inhibition to allow dynein activation (Fig. 2b, Movie 1). The speed and run-length of all dual-color DDBN<sup>min-zip</sup> complexes were analyzed, with the run length obtained from a one-phase exponential decay fit, and speed determined by the Gaussian distribution fit. The speed and run-length of DDBN<sup>min-zip</sup> were quantified as  $0.31 \pm 0.24$   $\mu\text{m/s}$  ( $n=68$ ) and  $3.4 \pm 0.23$   $\mu\text{m}$  ( $n=68$ ), respectively (Fig. 2e, f). The motile properties of DDBN<sup>min-zip</sup> were compared with that of the DDB<sup>CC1</sup> complex (containing the BicD2 N-terminal coiled-coil 1 (CC1) domain), which has been well established to be a fully active complex<sup>24,29</sup> (Fig. 2c). The speed and run-length of DDB<sup>CC1</sup> complex was  $0.50 \pm 0.29$   $\mu\text{m/s}$  ( $n=80$ ) and  $4.9 \pm 0.13$   $\mu\text{m}$  ( $n=80$ ), respectively, which are significantly faster ( $p < 0.001$ ) and longer ( $p = 0.03$ ) than that of DDBN<sup>min-zip</sup>. Nonetheless, the properties of DDBN<sup>min-zip</sup> are quite different from the auto-inhibited dynein-dynactin complex, which shows diffusive movement on MTs<sup>24</sup>. To determine whether Nup358<sup>min-zip</sup> alone can activate dynein-dynactin, we formed a complex of dynein-dynactin-Nup358<sup>min-zip</sup> (DDN<sup>min-zip</sup>) in which Nup358<sup>min-zip</sup> was labeled with 655nm Qdots. The DDN<sup>min-zip</sup> complex does not show directional movement but instead exhibits diffusive motion on MTs, implying that both BicD2 and Nup358 are required for dynein-dynactin processive motion (Fig. 2d; Movie 2). Our results suggest that Nup358 relieves the auto-inhibition of BicD2 so that dynein-dynactin can bind and move processively on MTs.

### NMR titration narrowed the BicD2 binding site to N-terminal half of Nup358-min

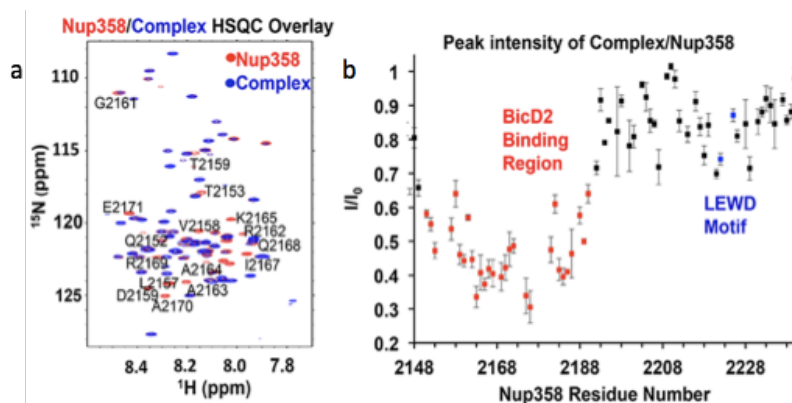

**Fig. 3.** NMR mapping of Nup358 regions involved in BicD2-CTD binding was performed by titration of <sup>15</sup>N labeled Nup358-min with BicD2-CTD. (a) The HSQC spectrum of a 1:1 Nup358-min/BicD2-CTD complex (blue) is overlaid on that of apo-Nup358-min (red). Many peaks disappeared in the complex spectrum (labeled by residue name and number), indicating that BicD2 binding causes slow to intermediate chemical exchange on the NMR time scale. (b) Plot of the peak intensity decrease vs the residue number of Nup358. The peak intensities of the 1:1 BicD2-CTD/Nup358-min complex spectrum were divided by the peak intensities of the apo-Nup358 spectrum to obtain  $I/I_0$ . Data points with an  $I/I_0$  of 0.65 or lower are colored red. This plot shows that the N-terminal half of Nup358-min is largely responsible for BicD2 binding. The peak intensities corresponding to the LEWD sequence motif (colored blue) in Nup358, which mediates binding of KLC2, is not affected by BicD2 binding.

Because our single molecule processivity assays confirmed that the Nup358-min domain is capable of forming a DDBN complex that is activated for processive motility, we characterized the BicD2-binding sites on Nup358-min, employing solution NMR, which can

provide atomic resolution information for protein interactions in the native solution state. First, backbone assignment of Nup358-min was carried out using standard triple resonance experiments, 3D HNCO<sup>56</sup>, HNCACO<sup>57</sup>, HNCA<sup>56</sup>, HNCACB<sup>58</sup>, and CBCACONH<sup>59</sup>. 82 out of the 89 possible backbone amides were assigned in the <sup>1</sup>H-<sup>15</sup>N HSQC (Fig. S3). Then <sup>15</sup>N labeled Nup358-min was titrated with unlabeled BicD2-CTD. Fig. 3a shows the overlay of the HSQC spectrum of apo Nup358-min with that of the complex, for which <sup>15</sup>N labeled Nup358-min and unlabeled BicD2-CTD were mixed at a 1:1 molar ratio. The HSQC spectrum of the apo Nup358-min is characterized by a lack of dispersion, consistent with an intrinsically disordered protein (IDP). Although the addition of BicD2-CTD resulted in little peak movement in the HSQC, significant peak intensity changes were observed for the N-terminal half of Nup358-min (Fig. 3a and 3b). This points to a relatively wide binding region undergoing intermediate to slow exchange on the NMR time scale, due to ligand binding.

Although this binding region is located on the Nup358-min domain that also contains the previously published KLC2 binding LEWD motif<sup>50</sup>, this BicD2 binding site is separated from the LEWD motif by over 30 residues (Fig. 3b). Residues 2192 to 2240 of Nup358 show little change between the apo sample and the complex (Fig. 3b), indicating that the LEWD motif is not involved in BicD2 binding. Therefore kinesin-1 and the dynein adaptor BicD2 may bind to separate but spatially close binding sites on the cargo adapter Nup358. The close proximity of these motor recognition sites may play a role in the regulation of bi-directional motility in order to orchestrate precise positioning of the nucleus.

### **CEST revealed a coil-to-helix transition at BicD2-Nup358 interface**

Although our results from the HSQC titrations establish the general region of the BicD2 interface in Nup358, the chemical shifts of the bound state were not obtained, due to peak disappearance in the HSQC upon BicD2 addition. To further characterize the BicD2/Nup358 interface with NMR, chemical exchange saturation transfer (CEST) experiments were performed. CEST has recently emerged as a powerful technique in solution NMR for measuring the chemical shifts of NMR invisible states<sup>60,61</sup>, such as the BicD2-CTD bound state of Nup358-min, whose resonances are absent from the <sup>15</sup>N-HSQC (Fig. 3 a, b). In CEST, when the invisible state is saturated by a weak and long radiofrequency (RF) pulse (B<sub>1</sub>), the saturation of the bound state will be transferred to the free state due to Nup358-min dissociating from the Nup358-min-BicD2 complex, causing a dip in peak intensity when B<sub>1</sub> is on resonance with the bound state chemical shift, generating the minor dip in the CEST curve. If the chemical shifts of bound and unbound state are significantly different, which is for example the case for interface residues or residues that undergo structural changes upon complex formation, this difference gives rise to a double-dip appearance in the CEST profile (Fig. 4c and 4d). The major dip in the profile will be observed at the chemical shift of the free or unbound state (when the B<sub>1</sub> matches the chemical shift of unbound resonance, the “visible state”). The second, smaller dip in the profile peak will be observed at the chemical shift of the bound state (due to saturation transfer from the “invisible state”). In contrast, residues that are not located at the complex interface or do not undergo structural changes upon complex formation will result in resonances without chemical exchange and the CEST profile will only show a single dip (Fig. 4a and 4b), corresponding to the chemical shift of the unbound state.

We performed CEST experiments on both the <sup>15</sup>N amide and the <sup>13</sup>C carbonyl (C') resonances. In <sup>15</sup>N CEST NMR experiments, the following residues were identified as interface



residues or residues that undergo structural transition because of the double dip appearance in the CEST profile: A2163, A2164, K2165, L2166, I2167, K2178, L2184 (Fig. S4). For these residues, CEST indicates a significant chemical shift difference between their bound and unbound states. Using the program RING NMR Dynamics<sup>62</sup>, the global exchange rate was  $k_{ex} = 360 \pm 50 \text{ s}^{-1}$  with the Trott-Palmer model (individual fits and the details of the curve fitting were provided in supporting table 1), consistent with slow to intermediate exchange ( $k_{ex} \ll \Delta\omega$ ) on an NMR time scale. Many peaks in the <sup>15</sup>N-CEST suffered from low-signal-to-noise ratio and resonance overlap common in IDPs, preventing the determination of additional chemical shifts of invisible states. To overcome this problem, we further carried out <sup>13</sup>C'-CEST experiments based on HNC0, which correlates amides (HN) with the carbonyl (CO) of the preceding residue.

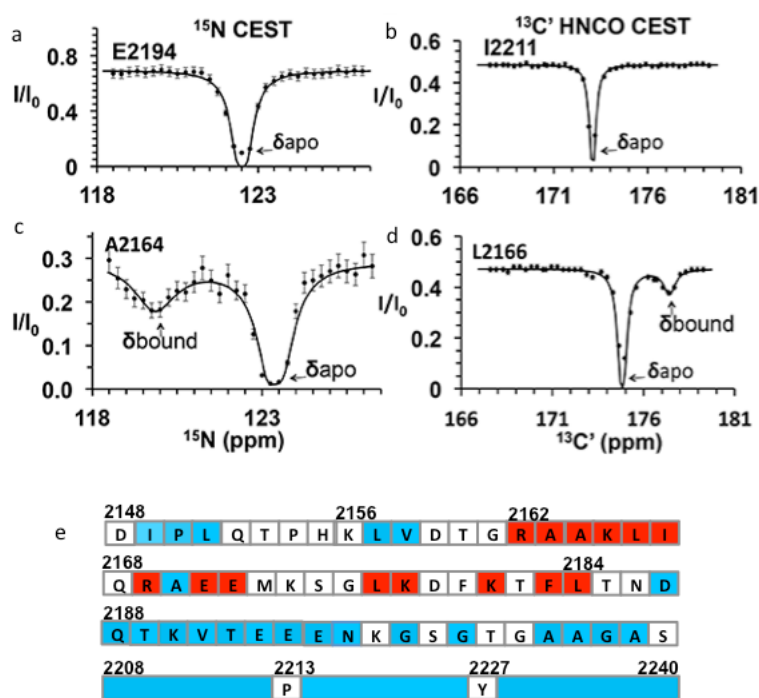

**Fig. 4. CEST maps chemical shifts of NMR-invisible, BicD2-bound state of Nup358.** In the CEST profile curve, E2194 and I2211 have only a single dip in <sup>15</sup>N-CEST (a) and <sup>13</sup>C'-CEST (b), respectively, due to little chemical shift perturbation upon BicD2-CTD binding. This suggests E2194 is not at the binding interface and does not undergo conformational transition upon BicD2-CTD binding. In contrast, A2164 shows not only a dip at the chemical shift of the apo HSQC assignment, but also a smaller dip at about 3 ppm to the left in <sup>15</sup>N-CEST (c), indicating that A2164 is in the binding region and/or experiences a conformational transition upon complex formation. d) L2166 has a major peak and then a minor peak about 2.5 ppm to the right. The magnitude and direction of the chemical shift difference suggests a random coil to  $\alpha$ -helical transition. e) Summary of the CEST data obtained across the entire Nup358-min region. Red squares show residues with double dip in CEST profile. Their chemical shift changes from the apo to the bound state indicate that these red residues are part of the  $\alpha$ -helical region at the Nup358/BicD2 interface. Blue colored residues show a single dip in CEST profile, suggesting these remain in random coil conformation. White represents residues where data were not obtained, due to low signal to noise ratio or resonance overlap. All the curves with double dips and a sampling of curves with only single dip fits are shown in Fig. S4 through S7.

Here the saturation pulse  $B_1$  is on the carbonyl, and intensity change due to saturation is still reported in an  $^{15}\text{N}$ -HSQC-like 2D spectrum. This method provided additional data for residues missed with the  $^{15}\text{N}$  CEST due to resonance overlap or low signal to noise ratio. With the  $^{13}\text{C}$  HNC0-CEST experiment, we were able to observe minor states in the following residues – R2162, A2164, K2165, L2166, R2169, E2171, E2172, L2177, K2181, F2183, and L2184 (Fig. S5). Thus, with CEST, we were able to further narrow the binding region to residues 2162 through 2184 (Fig. 4e). Fitting of HNC0-CEST profiles fit with RING Dynamics resulted in a global exchange rate of  $410 \pm 50 \text{ s}^{-1}$  with the Trott-Palmer method, in agreement with the  $k_{\text{ex}}$  from  $^{15}\text{N}$  CEST and slow to intermediate chemical exchange. The 18 CEST profiles with double dip appearance all resulted in chemical shift changes in the direction and magnitude as expected for a random coil to  $\alpha$ -helix transition<sup>17</sup> (typically the chemical shift for  $^{15}\text{N}$  becomes lower in the helical conformation, and higher for  $^{13}\text{C}$ , as shown in Table 1). The CEST results showed that Nup358 residue 2162-2184 undergoes coil to helix transition upon binding to BicD2, suggesting that BicD2 recognizes Nup358 through a short “cargo recognition  $\alpha$ -helix” which is embedded in an IDP domain.

**Table 1: Chemical shift differences from CEST of Nup358/BicD2 and apo-Nup358 ( $\Delta\delta_{\text{bound-apo}}$ ) match closely to  $\Delta\delta$  for coil to helix transition ( $\Delta\delta_{\text{helix-coil}}$ )<sup>\*\*\*</sup>.**

| Residue | $\Delta\delta_{\text{bound-apo}}$ | $\Delta\delta_{\text{helix-coil}}$ |
|---------|-----------------------------------|------------------------------------|
| A2163*  | -3.0                              | -2.2                               |
| A2164*  | -3.0                              | -2.2                               |
| K2165*  | -1.5                              | -1.3                               |
| L2166*  | -2.5                              | -1.9                               |
| I2167*  | -5.0                              | -1.2                               |
| E2171*  | -1.8                              | -1.4                               |
| K2178*  | -3.0                              | -1.3                               |
| L2184*  | -5.3                              | -1.9                               |
| R2162** | 1.6                               | 2.3                                |
| A2164** | 2.4                               | 1.7                                |
| K2165** | 2.7                               | 2.1                                |
| L2166** | 2.4                               | 1.6                                |
| R2169** | 2.7                               | 2.3                                |
| E2171** | 1.9                               | 2.2                                |
| E2172** | 2.0                               | 2.2                                |
| L2177** | 1.6                               | 1.6                                |
| K2181** | 3.0                               | 2.1                                |
| F2183** | 1.7                               | 1.5                                |
| L2184** | 1.8                               | 1.6                                |

\*Change in Chemical shifts of amide  $^{15}\text{N}$ .

\*\*Change in Chemical shifts of carbonyl  $^{13}\text{C}$ .

\*\*\*Values taken from Wishart, 2011<sup>63</sup>.

## CD spectroscopy confirms formation of an $\alpha$ -helix in Nup358 upon binding to BicD2

To provide further evidence for the random coil-to- $\alpha$ -helix transition, circular dichroism (CD) spectroscopy was carried out. The CD wavelength scans of the Nup358-min/BicD2-CTD complex had minima at 208 nm and 222 nm, characteristic for  $\alpha$ -helical proteins<sup>32</sup> (Fig. 5a). Such minima were absent in the CD spectra of Nup358-min, as expected for an intrinsically

disordered protein. Notably, the minima at 208 and 222 nm were shifted towards more negative values in the complex compared to the sum of the individual spectra of Nup358-min and BicD2-CTD, suggesting that the  $\alpha$ -helical content increases upon complex formation.

In order to quantify the increase of the  $\alpha$ -helical content, we determined the difference between the molar ellipticity at 222 nm of the complex and of the sum of the individual proteins,  $\Delta[\Theta]$ , to be  $-4874 \text{ deg}\cdot\text{cm}^2 \text{ d mol}^{-1}$  (Fig. 5a), which is a 12% change. We recently determined the experimental error to be  $\sim 5\%$  ( $[\Theta] = 2930 \text{ deg}\cdot\text{cm}^2 \text{ d mol}^{-1}$ )<sup>64</sup>, suggesting that the increase of the  $\alpha$ -helical content in the complex is significant. We also estimated the number of residues that transition from random coil to  $\alpha$ -helix upon complex formation, using a published thermal unfolding curve of the BicD2-CTD for calibration<sup>32</sup> (Fig. 5, Fig. S8 and ref. <sup>64</sup>). Based on these data, we estimate that the  $\alpha$ -helical content increases by  $14 \pm 5 \%$  upon Nup358/BicD2 complex formation, confirming a structural transition from random coil to  $\alpha$ -helix.

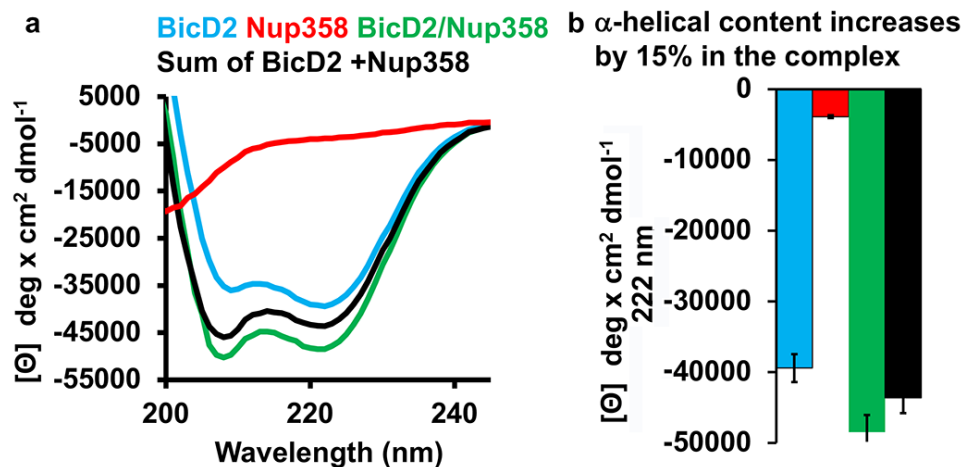

**Fig. 5. CD spectroscopy confirms  $\alpha$ -helix formation in the Nup358/BicD2 complex. (A)** CD wavelength scans of BicD2-CTD (cyan), Nup358-min (red) and the Nup358-min/BicD2 complex (green) at 4°C are shown. The sum of the individual wavelength scans of Nup358-min and BicD2-CTD is shown in black. The mean residue molar ellipticity  $[\Theta]$  versus the wavelength is shown. Experiments were repeated two or three times, representative scans are shown. (B) A characteristic feature of  $\alpha$ -helical structures is a local minimum at 222 nm. Values for  $[\Theta]$  at 222 nm are shown as a bar graph. Based on the values for  $[\Theta]$  at 222 nm and based on our calibration curve (Fig. S8), as well as the assumption, that native (0% unfolded) BicD2-CTD has an  $\alpha$ -helical content of 96% as observed in the crystal structure<sup>32</sup>, the Nup358/BicD2 complex has a 14 % increase in  $\alpha$ -helical content compared to the sum of the spectra of BicD2 and Nup358.

### The minimal Nup358/BicD2 complex has a rod-like shape that is more compact compared to the individual proteins

Small-Angle X-ray Scattering (SAXS) experiments were carried out to obtain a low-resolution structure of the Nup358-min/BicD2-CTD complex. The quality of our SAXS data was confirmed by molar mass calculations: for Nup358-min, we determined a molar mass of 12.3 kDa (Table S2), which matches closely to the calculated mass of a monomer (10.6 kDa). For the Nup358-min/BicD2-CTD complex, we determined a molar mass of 47.6 kDa (Table S2), which matches closely to the expected mass of a Nup358-min/BicD2-CTD complex with a 2:2 stoichiometry (calculated molar mass of 43.0 kDa). This is in line with our previously published SEC-MALS

data which suggest that apo Nup358-min forms monomers, while the Nup358/BicD2 complex has a 2:2 stoichiometry<sup>50,54</sup>.

A Kratky plot of the SAXS profiles further confirmed that Nup358-min is intrinsically disordered, since the signal increases at high  $q$  values instead of approaching zero (Fig. 6). In contrast, the Kratky plots of the BicD2-CTD and the Nup358-min/BicD2-CTD are bell-shaped, suggesting they are folded (Fig. 1, Fig. 6). Thus, Nup358-min becomes more compact upon complex formation with BicD2-CTD, consistent with the coil-to-helix transition observed from NMR and CD. The coil-to-helix transition is also corroborated by the radii of gyration ( $R_G$ ). For Nup358-min, which forms monomers,  $R_G$  was determined to be 28.4 Å (Table S2). To compare, the  $R_G$  of the Nup358-min/BicD2-CTD complex, which contains two molecules of Nup358-min and two molecules of BicD2-CTD is only 48.1 Å.

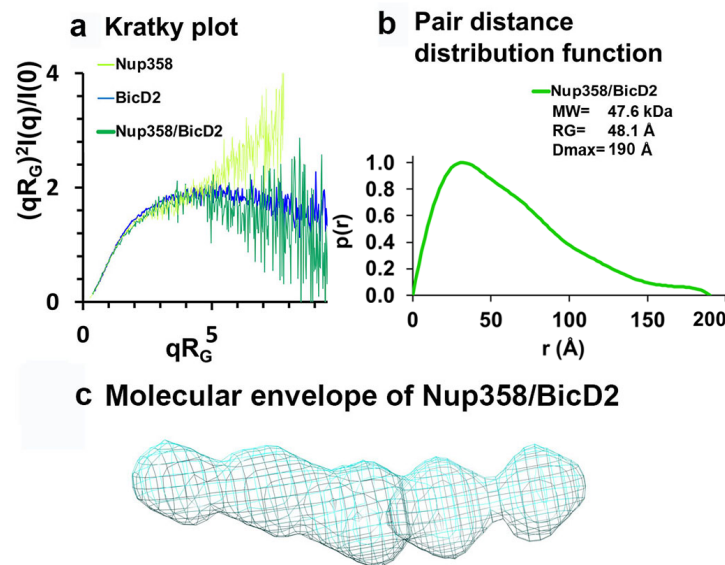

**Fig. 6. Low resolution structures determined by SAXS confirm that the complex has a rod-like shape that is more compact than the individual proteins.** (A) Dimensionless Kratky plots of the SAXS data collected from the minimal Nup358/BicD2 complex, from Nup358-min and BicD2-CTD ( $q$ : scattering vector,  $R_G$ : radius of gyration,  $I(q)$ : scattering intensity). (B) The pair distance distribution function,  $p(r)$ , of the Nup358-min/BicD2-CTD complex was derived from the scattering intensity profile (Fig. S9). The molecular weight  $MW$ <sup>65</sup>, the radius of gyration  $R_G$  from the Guinier plot and the largest dimension of the particle  $D_{max}$  are shown. (C) Refined bead model 3D reconstruction of the Nup358-min/BicD2-CTD complex (cyan mesh). The statistical analysis and supporting SAXS data are summarized in Table S2 and Figs. S9-12.

The pair distance distribution function ( $P(r)$ ) derived from the SAXS profile of the Nup358-min/BicD2-CTD complex has a peak which decays with a linear slope, which is characteristic for elongated, rod-like structures (Fig. 6). Since the width of a rod remains similar throughout the rod, the pair distance distribution will have a linear slope. The maximum particle diameter  $D_{Max}$  of the complex is 190 Å, which is identical to the  $D_{Max}$  that was determined for the BicD2-CTD sample (Table S2), suggesting that the overall length of the rod-structure does not change. Bead models of the Nup358-min/BicD2 complex were reconstructed from the  $P(r)$  functions and also show a flexible, rod-like structure for the complex (Fig. 6 c). The normalized

spatial discrepancy (NSD) is 0.7, suggesting the structural convergence and homogeneity of bead models reconstructed from SAXS profiles (Table S2).

Taken together, these data suggest that the complex has a 2:2 stoichiometry and is more compact than the apo state, further validating the coil-to-helix transition at the Nup358/BicD2 interface.

### Nup358 mutagenesis validates random coil to $\alpha$ -helix transition at interface

Our CEST, CD and SAXS data provided strong evidence that residues 2162-2184 of Nup358 undergo a structural transition from random coil to  $\alpha$ -helix upon complex formation with BicD2. To confirm our results, we also carried out alanine mutagenesis for all residues of the Nup358  $\alpha$ -helix and assessed binding of the mutated GST-tagged Nup358-min to BicD2-CTD by pulldown assays (Fig. 7 and Fig. S13). Eleven mutants displayed diminished binding, which are interspaced throughout the  $\alpha$ -helix. An  $\alpha$ -helical wheel representation was created, which revealed that these interface residues are clustered on one side of the  $\alpha$ -helical wheel (red in Fig. 7c). These results are consistent with the Nup358/BicD2 complex forming a helical bundle.

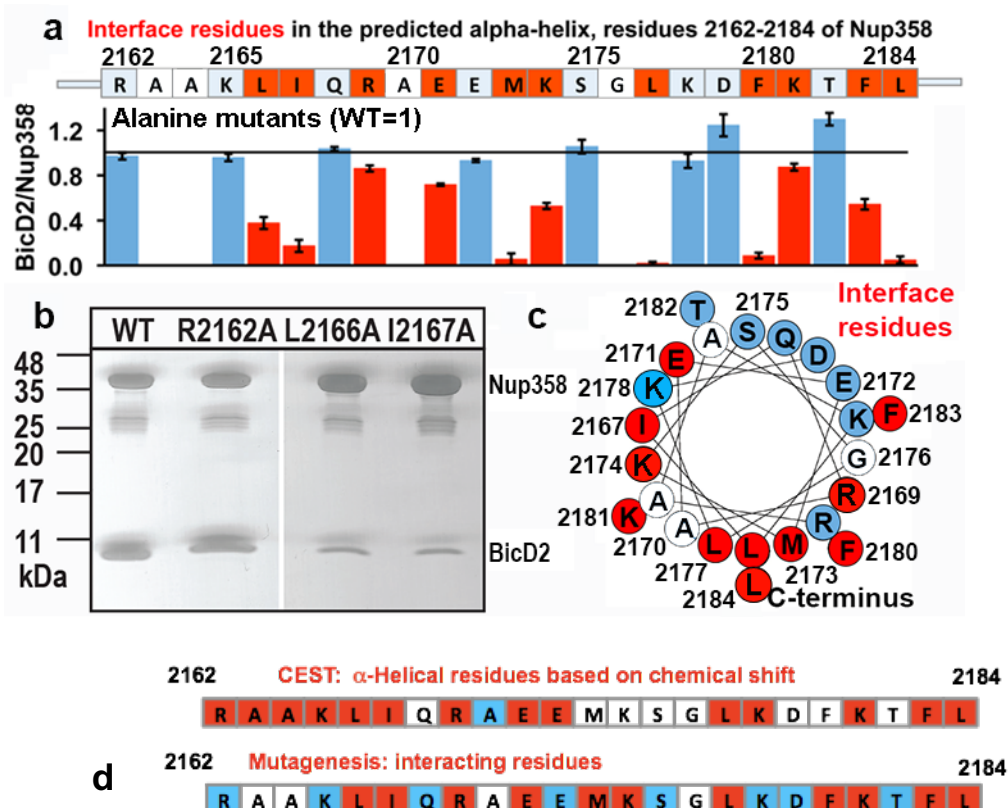

**Fig. 7. Mutagenesis of the Nup358 cargo recognition helix.** All residues of the Nup358  $\alpha$ -helix were mutated to alanine and binding to BicD2-CTD was assessed by pull-down assays. Nup358-min-GST was immobilized on glutathione sepharose beads and incubated with purified BicD2-CTD prior to elution with glutathione. The elution fractions were analyzed by SDS-PAGE and the intensities of the gel bands were quantified to obtain the ratio of bound BicD2-CTD/Nup358-min, normalized respective

to the wild-type (Fig. S13). Eleven interface residues were identified, which are colored red. Alanine and glycine residues were not assessed and are colored white. Residues for which mutations do not affect binding are colored light blue. (a) The sequence of the predicted  $\alpha$ -helix is shown above a bar graph of the ratios of bound BicD2 to Nup358 from the alanine mutant pull-down assays, normalized respectively to the WT (WT=1, indicated by the horizontal black line). The ratios were averaged from three independent experiments and the standard deviations were calculated as errors. (b) Representative SDS-PAGEs of elution fractions of the pull-down assays. The gel band intensities were quantified. A representative full dataset is shown in Fig. S13. (c) Helical wheel representation for (a). (d) Comparison of helical residues in Nup358-BicD2 complex identified by CEST and results from pulldown assay of mutants. Red: CEST positive (double dip in CEST profile) or strong reduction in binding from the pulldown assay with alanine mutation at this residue; blue: CEST negative (single dip in CEST profile) or no effect in mutagenesis; white: data not available.

The mutagenesis experiments are consistent with our results from NMR spectroscopy. While interfacial residues and residues that undergo the transition from random coil to the  $\alpha$ -helix will show a chemical shift change, not all residues in the new  $\alpha$ -helix in Nup358-min will be at the binding interface, therefore the mutagenesis data provides additional information. Notably, all interface residues that were identified from mutagenesis (red in Fig. 7 d) also had a double dip in the CEST profile (red in Fig. 7 d) or were not assessed (white in Fig. 7 d). Furthermore, removal of residues 2163-2166 (AAKL) of Nup358-min ( $\Delta$ AAKL), which were identified as interface residues by CEST virtually abolishes the interaction with the BicD2-CTD (Fig. S13 b). We also removed the  $\alpha$ -helix from Nup358-min, and as expected, the resulting Nup358-fragment (residues 2185-2240) shows virtually no interaction with the BicD2-CTD (Fig. S13 a, last lane). Finally, we successfully assembled a minimal complex of the BicD2-CTD with a Nup358 fragment (residues 2157-2199) that only contained the BicD2 binding site from NMR, which confirmed our mapped binding site (Fig. S13). Furthermore, known BicD2 residues that are important for Nup358 interaction include L746, R747, M749 and R753<sup>31</sup>, suggesting a potential binding site for the Nup358  $\alpha$ -helix on the BicD2-CTD coiled coil. In summary, our results from mutagenesis identified eleven interface residues and confirmed that residues 2162-2184 of Nup358 form an  $\alpha$ -helix for recognition by BicD2-CTD.

## Nup358-BicD2 interface is essential for dynein activation

Single-molecule binding and processivity assays were used to further explore the impact of Nup358 mutants on dynein recruitment and activation of dynein motility. We assessed the interaction between BicD2 and five Nup358<sup>min-zip</sup> mutants: I2167A, M2173A, L2177A, F2180A, and L2184A, in the context of the BN<sup>min-zip</sup> and the DDBN<sup>min-zip</sup> complex. The following parameters were quantified for WT and mutant Nup358<sup>min-zip</sup> constructs: (a) binding frequency of DDBN<sup>min-zip</sup> to MTs in the absence of MgATP, (b) percent complex formation with BicD2 alone or to the DDB complex, and (c) speed and run length of DDBN<sup>min-zip</sup> on MTs (Fig. 8).

The binding frequency of DDBN<sup>min-zip</sup> complexes to the MT was calculated by counting the number of dual-color Qdots bound to a MT divided by the MT length (Fig. 8a; Fig. S2b). The binding frequency of DDBN<sup>min-zip</sup> formed with the Nup358<sup>min-zip</sup> mutants I2167A, M2173A,

F2180A, and L2184A WT-Nup358<sup>min-zip</sup> was  $0.041 \pm 0.007/\mu\text{m}$  (n=29, with n being the number of microtubules),  $0.079 \pm 0.009/\mu\text{m}$  (n=30),  $0.069 \pm 0.009/\mu\text{m}$  (n=28),  $0.063 \pm 0.009/\mu\text{m}$  (n=28), which are significantly lower than that formed with WT Nup358<sup>min-zip</sup> (DDBN<sup>min-zip</sup>) ( $0.18 \pm 0.0143/\mu\text{m}$ , n=32) ( $p < 0.001$ ) (Fig. 8a). Unexpectedly, Nup358<sup>min-zip</sup>-L2177A is an outlier that showed a similar binding affinity to DDB ( $0.14 \pm 0.012/\mu\text{m}$ , n=30) as WT Nup358<sup>min-zip</sup> ( $p = 0.12$ ). In general, Nup358<sup>min-zip</sup> mutants reduced the binding frequency of DDBN<sup>min-zip</sup> complexes on MT tracks.

We assessed how these Nup358<sup>min-zip</sup> mutants affected the BicD2-Nup358<sup>min-zip</sup> (BN<sup>min-zip</sup>) interaction in the absence of dynein-dynactin. BicD2 and WT or mutant Nup358<sup>min-zip</sup> were labeled with different color Qdots and the number of dual-color complexes (BN<sup>min-zip</sup>) on the glass surface quantified using TIRF microscopy (Fig. 8 b, Fig. S14) (see Methods for details). Nup358<sup>min-zip</sup> binds BicD2 alone poorly, and the percentage of BN<sup>min-zip</sup> was reduced further for Nup358<sup>min-zip</sup> mutants (Fig. 8 b). We also quantified how the presence of dynein-dynactin influences the BicD2-Nup358<sup>min-zip</sup> interaction. Strikingly, in the presence of dynein-dynactin, the formation of DDBN<sup>min-zip</sup> complexes was about 2-3 times higher than the BN complexes (Fig. 8 b). The percent formation of BN<sup>min-zip</sup> was as follows: 14.13% (n=580) for WT, 3.9% (n=1142) for I2167A, 5.54% (n=1877) for M2173A, 9% (n=1744) for L2177A, 7.2% (n=1032) for F2180A and 6.3% (n=412) for L2184A Nup358<sup>min-zip</sup> (Fig. 8 b). In contrast, these values for DDBN<sup>min-zip</sup> complexes were 36.1% (n=945), 6% (n=986), 19.6% (n=347), 32.3% (n=904) and 16.7% (n=372) 15.5% (n=890) respectively (Fig. 8 b). The difference between DDBN<sup>min-zip</sup> and BN<sup>min-zip</sup> indicates that the presence of dynein-dynactin enhances the BicD2-Nup358 interaction.

The motion of DDBN<sup>min-zip</sup> formed with all Nup<sup>min-zip</sup> mutants was monitored. Except for the DDBN<sup>min-zip</sup> complex formed with L2177A mutant, all other complexes with Nup358<sup>min-zip</sup> mutants (I2167A, M2173A, F2180A and L2184A) showed slower speed and shorter run-length. For illustration, data obtained with the DDBN<sup>min-zip</sup> complex containing either WT, L2177A, or M2173A Nup358<sup>min-zip</sup> are shown in Fig. 8c, d. The speed and run length of the DDBN<sup>min-zip</sup> complex with Nup358<sup>min-zip</sup>-L2177A was the same as for Nup358<sup>min-zip</sup>-WT (Fig. 8 c, d). In contrast, the motion of a DDBN complex that contained Nup358<sup>min-zip</sup>-M2173A, a mutant that showed significantly lower MT binding frequency and complex formation than DDBN<sup>min-zip</sup>, was slower and shorter (Fig. 8 c, d). Therefore, the motility of DDBN<sup>min-zip</sup> is also compromised in the presence of these Nup358<sup>min-zip</sup> mutants.

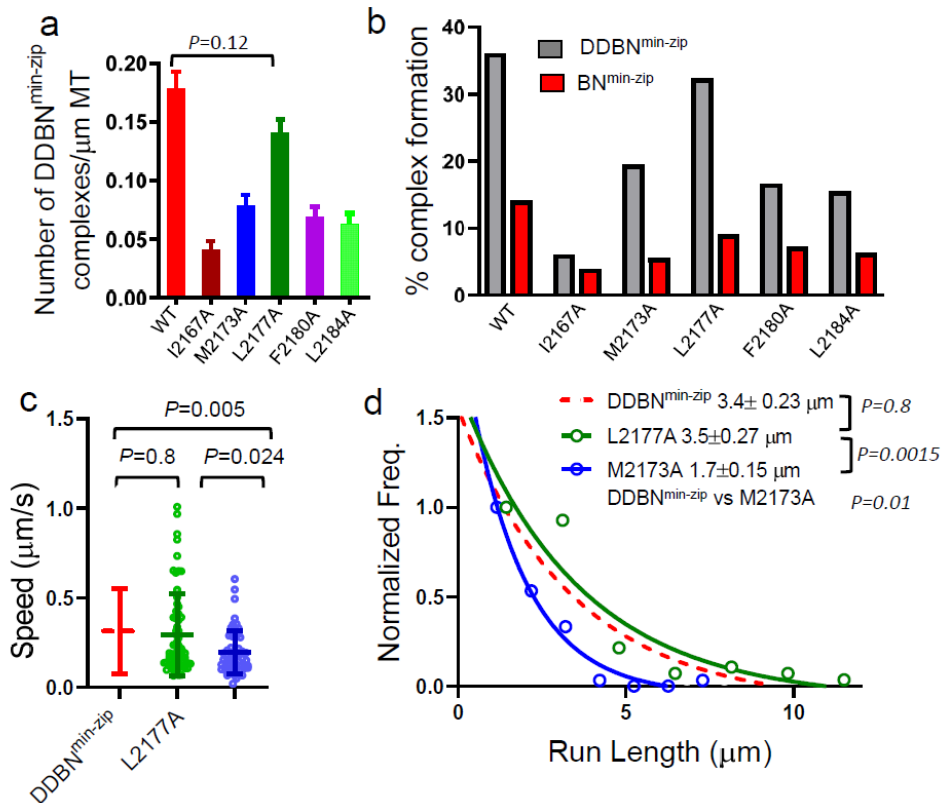

**Fig. 8. Nup358 point mutations that diminish the interaction with BicD2-CTD also diminish formation of the DDBN complex.** (a) Histogram of the binding frequency of DDBN<sup>min-zip</sup> complexes per micrometer MT length. The binding frequency of DDBN<sup>min-zip</sup> complexes formed with WT-Nup358<sup>min-zip</sup> is significantly higher ( $p < 0.0001$ ) than those formed with the Nup358<sup>min-zip</sup> mutants I2167A, M2173A, F2180A, and L2184A. WT-Nup358<sup>min-zip</sup> was  $0.041 \pm 0.007/\mu\text{m}$  ( $n=29$ , with  $n$  being the only mutant number of microtubules),  $0.079 \pm 0.009/\mu\text{m}$  ( $n=30$ ),  $0.069 \pm 0.009/\mu\text{m}$  ( $n=28$ ),  $0.063 \pm 0.009/\mu\text{m}$  ( $n=28$ ). Nup358<sup>min-zip</sup>-L2177A showed a similar binding affinity to DDB (  $0.14 \pm 0.012/\mu\text{m}$ ,  $n=30$ ) as WT-Nup358<sup>min-zip</sup> to DDBN<sup>min-zip</sup> ( $p=0.12$ , one-way ANOVA followed by Tukey's test). (b) The presence of dynein-dynactin (gray) increases the formation of BicD2- Nup358<sup>min-zip</sup> complexes (red). The percent formation of BN<sup>min-zip</sup> was: 14.13% ( $n=580$ ) for WT, 3.9% ( $n=1142$ ) for I2167A, 5.54% ( $n=1877$ ) for M2173A, 9% ( $n=1744$ ) for L2177A, 7.2% ( $n=1032$ ) for F2180A and 6.3% ( $n=412$ ) for L2184A Nup358<sup>min-zip</sup>. In contrast, these values for DDBN<sup>min-zip</sup> complexes were 36.1% ( $n=945$ ), 6% ( $n=986$ ), 19.6% ( $n=347$ ), 32.3% ( $n=904$ ), 16.7% ( $n=372$ ) and 15.5% ( $n=890$ ) respectively. (c) Comparison of the speeds of DDBN complexes formed with varying Nup358<sup>min-zip</sup> constructs. Nup358<sup>min-zip</sup> mutant L2177A (green) ( $0.29 \pm 0.22 \mu\text{m}$ ;  $N=69$ ) has the same speed as DDBN<sup>min-zip</sup> formed with WT- Nup358<sup>min-zip</sup> ( $0.31 \pm 0.24 \mu\text{m}$ ,  $N=68$ ; red; from Fig. 1e) ( $p=0.8$ , one way ANOVA followed by Tukey's test). The speed of DDBN formed with Nup358<sup>min-zip</sup> mutant M2173A ( $0.20 \pm 0.12 \mu\text{m}$ ,  $N=58$ ; blue) is significantly slower than that of DDBN-WT ( $p=0.005$ , one-way ANOVA followed by Tukey's test). (d) Run length of DDBN formed with WT-Nup358<sup>min-zip</sup> (red dashed line, from Fig. 2f) is the same as DDBN<sup>min-zip</sup> formed with Nup358<sup>min-zip</sup>-L2177A ( $p=0.8$ , one way ANOVA followed by Tukey's test). The run length of DDBN<sup>min-zip</sup> formed with Nup358<sup>min-zip</sup>-M2173A is significantly shorter than that of DDBN-WT ( $p=0.01$ , one-way ANOVA followed by Tukey's test).



## Discussion:

Dynein mediated nuclear positioning plays crucial roles in many fundamental biological processes, such as mitosis, meiosis, brain and muscle development<sup>2–16,66</sup>. However, the molecular mechanisms for cargo recognition by dynein adapter proteins remain poorly understood. Here, we used multiple biophysical and biochemical methods to elucidate the molecular details of the interface between dynein adaptor BicD2 and the cargo adaptor Nup358. First, we identified a minimal complex between BicD2-CTD and Nup358-min, with  $\mu\text{M}$  affinity. Single-molecule processivity assays revealed that a dimerized Nup358-min domain forms a complex with dynein/dynactin/BicD2 (DDBN) that is activated for processive motility on microtubules. The observation that dimerization of Nup358-min enhances the interaction with BicD2 and with the DDB complex suggests that the activation is linked to oligomerization. We next proceeded to characterize the structure of the minimal complex with NMR, CD and SAXS. NMR titration of BicD2-CTD into <sup>15</sup>N labeled Nup358-min narrowed the binding region to be in the N-terminal half of Nup358-min. However, due to slow chemical exchange on the NMR time scale and fast relaxation in the bound state, the BicD2-bound state of Nup358min cannot be directly observed in NMR, as in an NMR “invisible state”, or “dark state”. Therefore, a powerful solution NMR technique, CEST, was applied to map the chemical shifts of the “invisible state”. The CEST-derived bound state chemical shifts of Nup358-min not only identified key residues at the Nup358/BicD2 interface, but also showed that chemical shift changes upon binding correspond to that of a coil-to-helix transition in Nup358-min. This conformation change was confirmed by CD spectroscopy; furthermore, SAXS experiments confirmed that the Nup358-min/BicD2-CTD complex has a 2:2 stoichiometry<sup>54</sup> and is more compact than the individual proteins. The  $\alpha$ -helical interface was also validated by mutagenesis, which identified interface residues that form a stripe along the helical surface. Single molecule binding assays of four of these mutants confirmed that these mutants also diminish the interaction of Nup358-min with full-length BicD2 and with the DDB complex. Once the mutant DDBN complexes are formed (Fig. 8a and 8b), they are activated for processive motility, albeit with a reduced run length and speed. It is striking that these single point mutations have such a large impact on DDBN complex formation and dynein motility.

Based on these data, we propose a structural basis for cargo recognition through BicD2. Our results establish that BicD2 recognizes its cargo Nup358 through an  $\alpha$ -helix of  $\sim 28$  residues, which may be a structural motif that stabilizes BicD2 in its activated state. Coil-to-helix transition and folding upon binding, as shown here, have been observed in many studies of IDP/IDR interactions and recognition<sup>42,61,67</sup>. We therefore hypothesize that the dynein adapter BicD2 recognizes its cargos through a “cargo recognition  $\alpha$ -helix” (Fig. 9 a). It is conceivable that the cargo adapters Rab6GTP and nesprin-2G are also recognized by similar short  $\alpha$ -helices. Rab6GTP is a globular protein with several surface accessible  $\alpha$ -helices that would be promising candidates for BicD2 binding sites<sup>68–70</sup>. Our data thus suggest a structural basis for cargo recognition by BicD2 and will enable further studies aimed at identifying cell cycle specific regulatory mechanisms for distinct transport pathways that are facilitated by BicD2<sup>4,11,54</sup>.

A key step in activating dynein motility is the activation of BicD2 for dynein recruitment, and we and others have recently proposed that cargo-binding activates BicD2 for dynein recruitment by inducing a coiled-coil registry shift in BicD2 (i.e. a vertical displacement of the two  $\alpha$ -helices against each other by one helical turn)<sup>26,31,32,54</sup>. In the absence of cargo, BicD2 forms an auto-inhibited looped dimer that cannot recruit dynein, with the CTD masking the N-terminal dynein/dynactin-binding site (NTD)<sup>17–19,22–27,29,30,71</sup>. When cargo is loaded, BicD2 can directly link dynein with its activator dynactin, which is required to activate dynein for processive motility<sup>17–19,22–27,30,71</sup>. Our recent work showed that an F684I mutant of the *Drosophila* (*Dm*) homolog BicD can activate dynein/dynactin for processive motility in the absence of cargo. X-ray structures of the WT and F684I mutant as well as molecular dynamics simulations suggest that this activating mutation causes a coiled-coil registry shift in the *Dm* BicD-CTD<sup>32,64</sup>. It is very tempting to hypothesize that the cargo recognition helix of Nup358, intercalates into the coiled coil of the BicD2-CTD to stabilize a coiled-coil registry shift in the Nup358/BicD2 complex, resulting in activation of BicD2 for dynein recruitment. This hypothesis remains to be experimentally confirmed.

Interestingly, Nup358-min binds more strongly to the dynein/dynactin/BicD2 complex compared to full-length BicD2 alone (Fig. 8b). This observation supports the proposed loop-opening activation mechanism of BicD2<sup>24–26,64</sup> (Fig. 9 b, c). When only Nup358 and full-length BicD2 are present, the N-terminal region of BicD2 and Nup358 likely compete for binding to the BicD2-CTD, resulting in a lower apparent affinity. In contrast, in the context of the DDBN complex, once Nup358 binds to BicD2 and relieves its auto-inhibition, the NTD will interact with dynein-dynactin and prevent re-association of the NTD with the CTD, resulting in increased apparent affinity.

It is also possible that additional weak interfaces further stabilize the DDBN complex compared to Nup358/BicD2 or compared to the DDB<sup>CC1</sup> complex. Here we observed a direct interaction of Nup358 with dynein-dynactin that could contribute to enhanced affinity. It has been shown for several cargo adapters that they interact weakly with the dynein light chains<sup>72</sup> and the dynein light intermediate chain 1 (LIC1) forms a small interface with the NTD of BicD2, which is required for activation of processive motility<sup>42,43,67</sup>. Cargoes and adapters often interact through multiple interfaces with motors, and these additional interfaces in many cases enhance overall motility<sup>2,22,23,42,43,46,73,74</sup>.

Furthermore, the affinity of the monomeric cargo adapter Nup358-min towards BicD2 is enhanced when it is dimerized by a leucine zipper, similar to what was previously observed for binding of the cargo adapter Egalitarian for *Drosophila* BicD<sup>24,25</sup>. While Nup358-min is a monomer on its own, it oligomerizes to form 2:2 complexes with either the BicD2-CTD or the KLC2, and also forms a ternary complex with 2:2:2 stoichiometry<sup>50,54</sup>. We thus propose that cargo adaptor-induced dimerization of BicD2 and KLCs may potentially be a universal feature of the activation mechanism, since BicD2 and KLC2 both form dimers in active dynein and kinesin-1 motors<sup>22,29,50,75</sup>. Importantly, NMR titration showed that BicD2 binding has no effect on the NMR signal of the LEWD motif of Nup358 (Fig. 3), which can interact directly with KLC2<sup>50</sup>. These data further suggest that the Nup358-min domain is potentially capable of recruiting both dynein and kinesin-1 machineries for bi-directional positioning of the nucleus,

although this remains to be confirmed in the context of full-length proteins and intact motors. Intriguingly, our NMR data show that the BicD2 binding site is only separated by 30 residues from the LEWD motif that acts as KLC2 binding site. The close proximity of these binding sites may play a role in coordinating motility for bi-directional transport<sup>2-4,6,9,15,50,76-83</sup>. Another intriguing possibility is that if kinesin binding dimerizes Nup358, this may be the key initial step leading to BicD2 activation and recruitment of dynein-dynactin to form a bidirectional complex (Fig. 9). The ternary Nup358/BicD2/KLC2 complex may be representative for other transport modules, in which opposite polarity motors dynein and kinesin-1 act together.

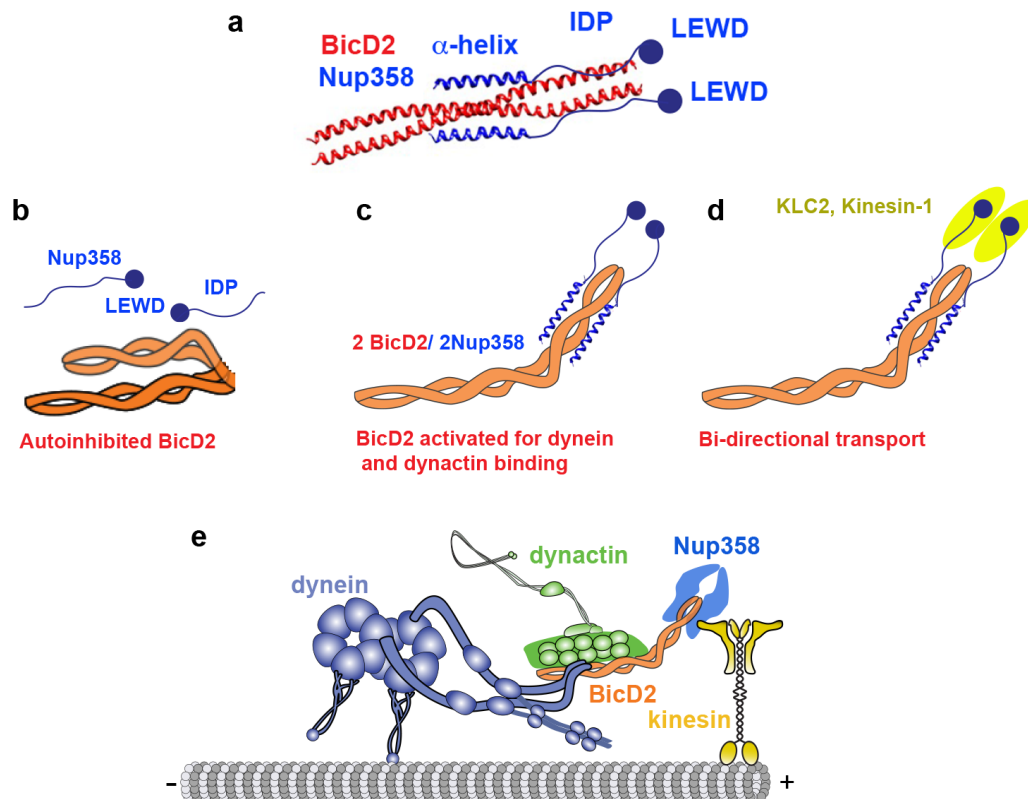

**Fig. 9. The role of “cargo-recognition  $\alpha$ -helix” in BicD2 interaction and activation.** We propose that BicD2 recognizes its cargo through a short “cargo-recognition  $\alpha$ -helix”, which may also be a structural feature that stabilizes the activated state of BicD2. (a) proposed structural model of the Nup358/BicD2 complex. (b) Schematic representation of the looped, autoinhibited conformation of BicD2 and of Nup358. (c) Upon cargo binding, a short  $\alpha$ -helix is formed in Nup358, which may be a structural feature that stabilizes BicD2 in the active state. (d) we propose that BicD2 and KLC2 interact simultaneously with Nup358. (e) Schematic representation of the proposed dynein/dynactin/BicD2/Nup358/kinesin-1 complex.

## Conclusion

Based on our data, we propose a structural basis for cargo recognition through the dynein adapter BicD2. Our results establish that BicD2 recognizes its cargo Nup358 through a small “cargo recognition alpha-helix” which is embedded in an IDR. This region undergoes a

structural transition from random coil to  $\alpha$ -helix upon binding to BicD2. Other cargo-adapters may also be recognized by similar  $\alpha$ -helices and therefore our results may facilitate the identification of regulatory mechanisms for BicD2 dependent transport pathways, which are important for cell cycle control, brain and muscle development and vesicle transport.

Activation of BicD2 is a key regulatory step for transport, as it is required to activate dynein for processive motility. The cargo recognition  $\alpha$ -helix may be a structural feature that stabilizes BicD2 in its activated state. We propose that binding of cargo induces a coiled-coil registry shift in BicD2, which promotes loop-opening and activates BicD2 for dynein/dynactin binding. Notably, Nup358 interacts more strongly with the dynein/dynactin/BicD2 complex compared to BicD2 alone, which supports the loop-opening mechanism for activation. We also show that BicD2 and KLC2 bind to spatially close, but non-overlapping binding sites on Nup358, supporting the hypothesis that Nup358 is capable of simultaneously recruiting dynein and kinesin-1 machineries to the nucleus for bi-directional transport.

## Methods:

### Protein expression and purification

Proteins were expressed and purified as previously described<sup>32,54,64</sup>. Codon-optimized expression constructs and point mutants were created by a commercial cloning and gene synthesis service (Genscript). For purification of isotope-labeled Nup358-min, the previously described expression vector for Nup358-min (which encoded the sequence for residues 2148-2240 of human Nup358 cloned into a pGEX6p1 vector)<sup>32</sup> was expressed in the *E. coli* Rosetta 2(DE3)-pLysS strain as described<sup>32</sup>, with the following modifications: M9 minimal media (3 g KH<sub>2</sub>PO<sub>4</sub>, 6.8 g Na<sub>2</sub>HPO<sub>4</sub>, 1 g NaCl, 4 g D-glucose, 1g NH<sub>4</sub>Cl, 2 mM MgSO<sub>4</sub>, 0.1 mM CaCl<sub>2</sub>, 100 µg Ampicillin and 35 µg Chloramphenicol per liter medium) were used for the expression, which was performed at 37 °C. For expression of <sup>15</sup>N labeled Nup358-min, unlabeled NH<sub>4</sub>Cl was replaced in the medium by 1g <sup>15</sup>NH<sub>4</sub>Cl per liter. For expression of <sup>13</sup>C and <sup>15</sup>N labeled Nup358-min, 1 g <sup>13</sup>C D-Glucose (U-13C6) and 1 g <sup>15</sup>NH<sub>4</sub>Cl was used per 1 L of M9 media instead of the unlabeled compounds. Isotopes were obtained from Cambridge Isotope Laboratories.

Nup358-min was purified using the previously described protocol<sup>50</sup>, but the cell pellet from a 6 liter bacteria culture was dissolved in 75 ml of the lysis buffer to which 1 ½ tablets of complete EDTA-free protease inhibitor cocktail tablets were added (Roche). In short, Nup358-min was purified by glutathione affinity chromatography and eluted by proteolytic cleavage on the column with PreScission protease. The protein was further purified by size exclusion chromatography as described<sup>50</sup>, using the following buffer: 20 mM HEPES pH 7.5, 150 mM NaCl, 0.5 mM TCEP.

BicD2-CTD was expressed and purified as previously described<sup>32,50,54</sup>. In short, BicD2-CTD was purified by Ni-NTA affinity chromatography, followed by proteolytic cleavage of the His6-tag by thrombin. BicD2-CTD was further purified by a second round of Ni-NTA affinity chromatography, followed by size exclusion chromatography in the same buffer as described above. The Nup358 (residues 2157-2199)/BicD2-CTD complex was purified as described for the Nup358-min/BicD2-CTD complex<sup>32</sup>.

### Isothermal titration calorimetry (ITC)

ITC experiments were performed as previously described<sup>54</sup>. For ITC experiments, BicD2-CTD was placed in the cell of a calorimeter (GE Microcal ITC200) and titrated with Nup358-min (either without the GST-tag (Fig. 1) or with the GST-tag intact (Fig. S1)) at 25 °C. A second titration curve of Nup358-min (with or without the GST-tag) into buffer was recorded and subtracted as blank. The curve was fitted with the one-site model to determine the the number of sites *N*, the equilibrium binding constant *K*, the change in entropy  $\Delta S$  and the change in enthalpy  $\Delta H$ . The affinity (dissociation constant *K<sub>d</sub>*) was calculated as the inverse of *K*. Data was analyzed with the Origin software (OriginLab). For the titration of Nup358-min + BicD2-CTD, the protein concentrations were 0.27 mM (Nup358-min) and 0.019 mM (BicD2-CTD), respectively. For the titration of Nup358-min-GST + BicD2-CTD, the protein concentrations were 0.12 mM (Nup358-min-GST) and 0.013 mM (BicD2-CTD), respectively. The buffer contained 150 mM NaCl, 30 mM HEPES pH 7.5, 0.5 mM TCEP, and 1mM MgCl<sub>2</sub>.

## Pull-down assays

All constructs were expressed in the BL21(DE3)-RIL *E. coli* strain. GST-pull down assays of human Nup358-min-GST and human BicD2-CTD were performed as described<sup>64</sup>. For the assays, Nup358-min-GST was immobilized on glutathione sepharose beads and incubated with purified BicD2-CTD prior to elution with glutathione. The elution fractions were analyzed by SDS-PAGE (16% acrylamide gels) and stained with Coomassie Blue. ImageJ was used for quantification of gel bands<sup>84</sup>.

## Nuclear Magnetic Resonance (NMR)

HSQC NMR experiments of <sup>15</sup>N-labeled Nup358-min were recorded on a 0.2 mM 440  $\mu$ l sample with 10% D<sub>2</sub>O on a Bruker 800 MHz spectrometer equipped with a cryoprobe at 25 °C. HSQC was taken on a 1:1 mixture of <sup>15</sup>N-Nup358min-BicD2-CTD, where the sample was concentrated to keep the concentration of Nup358-Min to 0.2 mM in 20 mM HEPES pH 7.5, 150 mM NaCl, 0.5 mM TCEP.

For backbone assignment, triple resonance experiments (HNCO, HNCA, HNCACO, HNCOCA, HNCACB, CBCCACONH, and HNN<sup>85</sup>) were performed on double-labeled <sup>15</sup>N/<sup>13</sup>C Nup358-min at 0.4 mM on a Bruker 800 MHz spectrometer equipped with a cryoprobe. They were performed with non-uniform sampling (NUS) Processing of the data was performed with NMRPipe<sup>86</sup> and SMILE<sup>87</sup>. Further analysis of the data was performed with nmrfam\_Sparky<sup>88</sup>, including iPine<sup>89,90</sup>.

<sup>15</sup>N CEST NMR was performed with a 0.6 mM sample and a 10:1 ratio of <sup>15</sup>N-Nup358-min:BicD2-CTD. The temperature was reduced to 20°C, and the pH was reduced to 6.5 to help improve signal/noise by decreasing the rate of solvent exchange of amide protons. <sup>15</sup>N DCEST NMR<sup>91,92</sup> was performed with the same sample conditions. For both experiments, the 800 MHz spectrometer with cryoprobe was used. For CEST, the saturation pulse was 400 ms at both 10 Hz and 20 Hz. The saturation frequency was shifted from 118 ppm (the center of the HSQC spectrum) to 128 ppm in steps of 0.25 ppm in CEST. The DCEST was performed to cover the whole spectral width for amides, with a 10 Hz saturation and a 700 Hz spectral width, and a 20 Hz saturation pulse with a 600 Hz spectral width.

<sup>13</sup>C' HNCO-CEST NMR<sup>61</sup> was performed with a 0.6 mM sample and a 20:1 ratio of Nup358-Min:BicD2-CTD at 20 °C and pH of 6.5. For this experiment, a 600 MHz spectrometer with cryoprobe was used to minimize <sup>13</sup>C' transverse relaxation. The saturation pulse was 300 ms at 10 Hz. The saturation frequency was shifted from 170 to 180 ppm in steps of 0.25 ppm.

The CEST data was fit with the program RING NMR Dynamics<sup>62</sup>. It has the option of fitting with different models. We found the best solutions using EXACT0 on the individual residue level and the Trott-Palmer method the best method for a global fit.

## CD spectroscopy

CD spectroscopy was performed as previously described<sup>64</sup>. Purified proteins at a concentration of 0.3 mg/ml were dialyzed in the following buffer: 150 mM NaCl, 10 mM Tris pH 8 and 0.2 mM

TCEP. Data were recorded with a Jasco J-1100 CD Spectrometer, equipped with a thermoelectric control device. A quartz cuvette with a path length of 0.1cm was used. After the buffer baseline subtraction, CD signals were normalized to the protein concentration and converted to mean residue molar ellipticity  $[\Theta]$ . Thus, the ellipticity  $\Theta$  (mdeg) was multiplied with the conversion factor  $391.51 \text{ cm}^2 \text{ dmol}^{-1}$  for all spectra with exception of the Nup358-min spectrum, for which the conversion factor was  $362.00 \text{ cm}^2 \text{ dmol}^{-1}$ . For the Nup358 + BicD2 spectrum, the spectra of Nup358-min and BicD2-CTD were added together prior to conversion to mean residue molar ellipticity.

### SAXS experiments

Nup358-min and BicD2-CTD were purified as described above. The monodispersity of the protein was confirmed by SEC-MALS which is published<sup>32,54</sup>.

Purified Nup358-min and BicD2-CTD was dialyzed against the following buffer: 150 mM NaCl, 20 mM HEPES pH 7.5, 0.5 mM TCEP. The dialysis buffer was used as buffer match for SAXS experiments as well as for dilutions. The following protein concentrations were used: Nup358-min 4 mg/ml, BicD2-CTD 1 mg/ml. To assemble the complex, Nup358-min and BicD2-CTD were mixed in 1:1 molar ratio and incubated for 30 minutes on ice, with a final concentration of 1.3 mg BicD2-CTD and 1.3 mg Nup358-min. The affinity of BicD2-CTD towards Nup358-min is  $1.7 \pm 0.9 \mu\text{M}$  (Fig, 1), therefore this protein concentration is sufficient for complex formation. To assure monodispersity, SAXS-data were collected for at least 3 protein concentrations for each sample, and we also collected data of a Nup358-min/BicD2-CTD complex that was further purified by gel filtration, with comparable results (data not shown). Prior to data collection, samples were thawed, filtered (pore size  $0.2 \mu\text{m}$ ) and centrifuged (30 min, 21,700 g,  $4^\circ\text{C}$ ).

SAXS data was collected at the beam line 7A1 at the Cornell High Energy Synchrotron Source (CHESS), with a dual Pilatus 100k detector system (Dectris, Baden, Switzerland), at a single detector position, on July 3, 2019 as described previously<sup>93</sup>. Quartz capillary with a path length of 1.6 mm was used as the sample cell (OD=1.5 mm, wall thickness=10  $\mu\text{m}$ ). For each dataset, 20 frames were collected at  $4^\circ\text{C}$ , with 0.1 s exposure times (wavelength = 9.835 keV, beam dimensions =  $250 * 250 \mu\text{m}$ , beam current = 49.9 mA (positrons), beam flux =  $2.4 * 10^{12}$  photons/s). Most samples showed no detectable radiation damage, which was monitored by averaging 20 frames.

SAXS data were processed with the BioXTAS RAW software suite (version 2.0.3)<sup>94</sup>. To obtain scattering intensity profiles, 20 data frames were reduced to scattering intensity profiles, placed on an absolute scale, averaged, and the scattering intensity profile of the buffer match was subtracted. The data quality was assessed by Guinier plots, molar mass calculations and dimensionless Kratky plots in BioXTAS RAW<sup>94-98</sup>. Pair distance distribution  $p(r)$  functions were derived from the scattering intensity profiles by the program GNOM<sup>99</sup> of the ATSAS 3.0.0-1 software suite<sup>100</sup> (implemented in RAW<sup>94</sup>). Fifteen bead model 3D reconstructions were performed with the Dammiff program<sup>101</sup>, (implemented in ATSAS/RAW<sup>94,100</sup>). The resulting models were aligned, grouped into clusters, averaged, and the average model was refined in Dammiff<sup>101-103</sup>. Figures of the refined molecular envelopes were created in the program UCSF Chimera (version 1.14)<sup>104</sup>, developed by the Resource for Biocomputing, Visualization, and

Informatics at the University of California, San Francisco, with support from NIH P41-GM103311. P(r) functions were normalized to the highest signal of each curve.

## Protein expression and purification for single-molecule assays

Cytoplasmic dynein and dynactin were purified from 300 gm bovine brain as described in (Bingham *et al.*, 1998), and tubulin was purified from 200g bovine brain as described in (Castoldi and Popov, 2003). Purified dynein was stored at  $-20^{\circ}\text{C}$ , and dynactin and tubulin were stored at  $-80^{\circ}\text{C}$ , in 10 mM imidazole, pH 7.4, 0.2 M NaCl, 1 mM EGTA, 2 mM DTT, 10  $\mu\text{M}$  MgATP, 5  $\mu\text{g}/\text{mL}$  leupeptin, 50% glycerol. The N-terminal domain of human BicD2 (BicD2<sup>CC1</sup>) with a biotin tag at its N-terminus was expressed in bacteria as described<sup>24</sup>. Full-length human wild type BicD2 was expressed in Sf9 cells as described for *Drosophila* BicD in Sladewski *et al.*<sup>24</sup>. The Bradford reagent (Bio-Rad, USA) was used to measure the protein concentration. To create a fluorescently labelled version of Nup358-min, the expression vector described above was modified to include a SNAP-tag for fluorescent labelling at its C-terminal domain, which is referred to as Nup358<sup>min</sup>. Nup358<sup>min</sup> was expressed and purified with the N-terminal GST-tag intact as described for Nup358-min<sup>50,54</sup>, using the BL21-CodonPlus-RIL strain for expression. Nup358<sup>min</sup> was dimerized using a leucine zipper (hereafter called Nup358<sup>min-zip</sup>); the leucine zipper sequence was added at the C-terminus before the snap-tag. The SNAP tag on Nup358<sup>min-zip</sup> and Nup358<sup>min</sup> was biotinylated with SNAP-biotin substrate (New England BioLabs, MA) as described in Sckolnick *et al.*<sup>105</sup>.

## Single Molecule assay

Dynein, dynactin, BicD2 and Nu358<sup>min-zip</sup> constructs were diluted into high salt buffer (30 mM HEPES pH 7.4, 300 mM potassium acetate, 2 mM magnesium acetate, 1 mM EGTA, 20 mM DTT) and clarified for 20 min at 400,000 x g to remove aggregates. To form the dynein-dynactin-BicD2-Nup358<sup>min-zip</sup> (DDBN<sup>min-zip</sup>) complex, BicD2 and Nup358<sup>min-zip</sup> were mixed with 565nm and 655nm streptavidin Quantum Dots (Qdots) (Invitrogen, CA), respectively, at a 1:1 molar ratio in separate tubes and incubated 15 min on ice. To block excess binding sites on streptavidin Qdots, 5 $\mu\text{M}$  biotin was added to both tubes. Labeled BicD2 and Nup358<sup>min-zip</sup> were then mixed with preformed dynein-dynactin complex at a molar ratio of 1:1:1:2 (500 nM dynein, 500 nM dynactin, 500 nM BicD2 and 1 $\mu\text{M}$  Nup358<sup>min-zip</sup>) and incubated on ice for 30 min in motility buffer (30 mM HEPES pH 7.4, 150 mM potassium acetate, 2 mM magnesium acetate, 1 mM EGTA, 20 mM DTT). The dynein-dynactin-Nup358<sup>min-zip</sup> (DDN<sup>min-zip</sup>) complex contained Nup358<sup>min-zip</sup> that was labeled with a 655 nm Qdot. In the dynein-dynactin-BicD2<sup>CC1</sup> (DDB<sup>CC1</sup>) complex, BicD2<sup>CC1</sup> was labeled with a 525 nm streptavidin Qdot. The DDBN<sup>min-zip</sup>, DDN<sup>min-zip</sup> and DDB<sup>CC1</sup> complexes were diluted in motility buffer (30 mM HEPES pH 7.4, 150 mM potassium acetate, 2 mM magnesium acetate, 1 mM EGTA, 2 mM MgATP, 20 mM DTT, 8 mg/mL BSA, 0.5 mg/mL kappa-casein, 0.5% pluronic F68, 10 mM paclitaxel and an oxygen scavenger system) to a final concentration of 1.25-2.50 nM dynein for observing motion on microtubules. The oxygen scavenging system consisted of 5.8 mg/ml glucose, 0.045 mg/ml catalase, and 0.067 mg/ml glucose oxidase (Sigma-Aldrich-Aldrich). To analyze the motion of the complexes without any ambiguity, oxygen scavengers were not used in two-color experiments so that the microtubules would photo bleach. Purified tubulin was mixed with rhodamine labeled tubulin at a molar ratio of 10:1 and polymerized as described<sup>24</sup>. PEGylated glass slides were prepared and coated with 0.3 mg/mL rigor kinesin for microtubule attachment as described<sup>24</sup>. After rinsing 2-3 times with motility buffer to remove excess rigor kinesin, dynein protein samples were added to the glass surface. Motion of DDBN<sup>min-zip</sup>, DDN<sup>min-zip</sup> and DDB<sup>CC1</sup> were observed using TIRF microscope as described<sup>24</sup>.

## Microscopy and Data Analysis



To detect the motion of Qdot labeled DDBN<sup>min-zip</sup> and DDB<sup>CC1</sup> complexes on microtubules, Total Internal Reflection Fluorescence (TIRF) microscopy was used. The TIRF microscope system is operated by the Nikon NIS Elements software and single molecule images were acquired on a Nikon ECLIPSE Ti microscope equipped with through objective type TIRF. The laser lines 488 and 561 nm were used to illuminate 525nm and 655nm Qdots and rhodamine-labeled microtubules. Typically, 600 frames were captured at 200 ms intervals (five frames/s) using two Andor EMCCD cameras (Andor Technology USA, South Windsor, Connecticut). Individual Qdots were tracked using the ImageJ MTrackJ plugin for run length and speed measurements of single complexes (Meijering et al., 2012). Run length is defined as the total travel distance by individual complexes, and speed was calculated by dividing the run length by the total time. To determine the characteristic run length, data were binned with Sigma plot (Systat Software, Inc) and fit with the equation  $p(x) = Ae^{-x/\lambda}$ , where  $p(x)$  is the relative frequency,  $x$  is the travel distance along a microtubule track and  $A$  is the amplitude. Speed was reported as mean  $\pm$  standard deviation (SD), and run length reported as mean  $\pm$  standard error (SE). Binding frequency was calculated by counting the number of dual colors Qdots per time per  $\mu\text{m}$  microtubule. The number of dual color Qdots (DDBN<sup>min-zip</sup>) were counted on 28-32 microtubules (total  $\sim 500 \mu\text{m}$ ) in each case. For measuring the formation of DDBN<sup>min-zip</sup> and BN<sup>min-zip</sup> complexes containing WT or mutant Nup358<sup>min-zip</sup>, the number of dual color and single color (green or red) Qdots were counted on multiple 512 x 512 pixel fields. The percentage of colocalization was calculated from the total number of dual color Qdots divided by all dual and single color Qdots. Statistical significance for two sets of run length data were determined by the Kolmogorov-Smirnov test, a nonparametric distribution. For speed data comparison, an unpaired t-test was performed. For three or more data sets of run length or speed, statistical significance was calculated using one-way ANOVA followed by Tukey's post-hoc test. Statistical differences for binding frequency of DDBN<sup>min-zip</sup> containing WT or mutant Nup358<sup>min-zip</sup> were determined by one way ANOVA followed by Tukey's post-hoc test.

## References:

1. Reck-Peterson, S. L., Redwine, W. B., Vale, R. D. & Carter, A. P. The cytoplasmic dynein transport machinery and its many cargoes. *Nat Rev Mol Cell Biol* **19** (2018).
2. Fu, M.-M. & Holzbaur, E. L. F. Integrated regulation of motor-driven organelle transport by scaffolding proteins Microtubule-Based Transport in the Cell. *Trends Cell Biol* **24**, 564–574 (2014).
3. Hendricks, A. G. *et al.* Motor Coordination Via Tug-Of-War Mechanism Drives Bidirectional Vesicle Transport. *Curr Biol* **20**, 697–702 (2010).
4. Hu, D. J. D. J. K. *et al.* Dynein recruitment to nuclear pores activates apical nuclear migration and mitotic entry in brain progenitor cells. *Cell* **154**, 1300 (2013).
5. Baffet, A. D. A. D., Hu, D. J. D. J. & Vallee, R. B. R. B. Cdk1 Activates Pre-mitotic Nuclear Envelope Dynein Recruitment and Apical Nuclear Migration in Neural Stem Cells. *Dev Cell* **33**, 703–716 (2015).
6. Gonçalves, J. C., Quintremil, S., Yi, J. & Vallee, R. B. Nesprin-2 Recruitment of BicD2 to the Nuclear Envelope Controls Dynein/Kinesin-Mediated Neuronal Migration In Vivo. *Curr Biol* **30**, 3116-3129.e4 (2020).
7. Zhang, Q. *et al.* Nesprin-1 and -2 are involved in the pathogenesis of Emery–Dreifuss muscular dystrophy and are critical for nuclear envelope integrity. *Hum Mol Genet* **16**, 2816–2833 (2007).
8. Zhang, X. *et al.* SUN1/2 and Syne/Nesprin-1/2 Complexes Connect Centrosome to the Nucleus during Neurogenesis and Neuronal Migration in Mice. *Neuron* **64**, 173–187 (2009).
9. Wilson, M. H. & Holzbaur, E. L. F. Opposing microtubule motors drive robust nuclear dynamics in developing muscle cells. *J Cell Sci* **125**, 4158–4169 (2012).
10. Zhu, R., Antoku, S. & Gundersen, G. G. Centrifugal Displacement of Nuclei Reveals Multiple LINC Complex Mechanisms for Homeostatic Nuclear Positioning. *Curr. Biol.* **27**, 3097-3110.e5 (2017).
11. Splinter, D. *et al.* Bicaudal D2, dynein, and kinesin-1 associate with nuclear pore complexes and regulate centrosome and nuclear positioning during mitotic entry. *PLoS Biol* **8**, e1000350 (2010).
12. Bolhy, S. *et al.* A Nup133-dependent NPC-anchored network tethers centrosomes to the nuclear envelope in prophase. *J. Cell Biol.* **192**, 855–871 (2011).
13. Morris, R. L. & Hollenbeck, P. J. The regulation of bidirectional mitochondrial transport is coordinated with axonal outgrowth. *J. Cell Sci.* **104**, 917–927 (1993).
14. Soppina, V., Rai, A. K., Ramaiya, A. J., Barak, P. & Mallik, R. Tug-of-war between dissimilar teams of microtubule motors regulates transport and fission of endosomes. *Proc Natl Acad Sci U S A* **17** (2009).
15. Encalada, S. E., Szpankowski, L., Xia, C. H. & Goldstein, L. S. B. Stable kinesin and dynein assemblies drive the axonal transport of mammalian prion protein vesicles. *Cell* **144**, 551–565 (2011).
16. Dharan, A. & Campbell, E. M. Role of Microtubules and Microtubule-Associated Proteins in HIV-1 Infection. *J. Virol.* **92**, (2018).
17. Splinter, D. *et al.* BICD2, dynactin, and LIS1 cooperate in regulating dynein recruitment to cellular structures. *Mol. Biol. Cell* **23**, 4226–4241 (2012).
18. Schlager, M. A. *et al.* Bicaudal D Family Adaptor Proteins Control the Velocity of Dynein-Based Movements. *Cell Rep.* **8**, 1248–1256 (2014).

19. Hoogenraad, C. C. *et al.* Bicaudal D induces selective dynein mediated microtubule minus end directed transport. *EMBO J* **22**, 6004–6015 (2003).
20. Schlager, M. A., Hoang, H. T., Urnavicius, L., Bullock, S. L. & Carter, A. P. In vitro reconstitution of a highly processive recombinant human dynein complex. *EMBO J* **33**, 1855–1868 (2014).
21. McKenney, R. J., Huynh, W., Vale, R. D. & Sirajuddin, M. Tyrosination of  $\alpha$ -tubulin controls the initiation of processive dynein–dynactin motility. *EMBO J.* **35**, 1175–1185 (2016).
22. Urnavicius, L. *et al.* The structure of the dynactin complex and its interaction with dynein. *Sci.* **347**, 1441–1446 (2015).
23. Urnavicius, L. *et al.* Cryo-EM shows how dynactin recruits two dyneins for faster movement. *Nature* **554**, 202–206 (2018).
24. Sladewski, T. E. *et al.* Recruitment of two dyneins to an mRNA-dependent Bicaudal D transport complex. *Elife* **7**, e36306 (2018).
25. McClintock, M. A. *et al.* RNA-directed activation of cytoplasmic dynein-1 in reconstituted transport RNPs. *Elife* **7**, e36312 (2018).
26. Liu, Y. *et al.* Bicaudal-D uses a parallel, homodimeric coiled coil with heterotypic registry to coordinate recruitment of cargos to dynein. *Genes Dev* **27**, 1233–1246 (2013).
27. Hoogenraad, C. C. *et al.* Mammalian Golgi associated Bicaudal D2 functions in the dynein dynactin pathway by interacting with these complexes. *EMBO J* **20**, 4041–4054 (2001).
28. Matanis, T. *et al.* Bicaudal-D regulates COPI-independent Golgi-ER transport by recruiting the dynein-dynactin motor complex. *Nat Cell Biol* **4**, 986–992 (2002).
29. McKenney, R., Huynh, W., Tanenbaum, M., Bhabha, G. & Vale, R. Activation of cytoplasmic dynein motility by dynactin-cargo adapter complexes. *Science* **345**, 337–341 (2014).
30. Cianfrocco, M. A., DeSantis, M. E., Leschziner, A. E. & Reck-Peterson, S. L. Mechanism and regulation of cytoplasmic dynein. *Annu Rev Cell Dev Biol* **31**, 83–108 (2015).
31. Terawaki, S., Yoshikane, A., Higuchi, Y. & Wakamatsu, K. Structural basis for cargo binding and autoinhibition of Bicaudal-D1 by a parallel coiled-coil with homotypic registry. *Biochem Biophys Res Commun* **460**, 451–456. (2015).
32. Noell, C. R. *et al.* Role of Coiled-Coil Registry Shifts in the Activation of Human Bicaudal D2 for Dynein Recruitment upon Cargo Binding. *J. Phys. Chem. Lett.* **10**, 4362–4367 (2019).
33. Wu, J., Matunis, M. J., Kraemer, D., Blobel, G. & Coutavas, E. Nup358, a cytoplasmically exposed nucleoporin with peptide repeats, RanGTP binding sites, zinc fingers, a cyclophilin A homologous domain, and a leucine-rich region. *J Biol Chem* **270**, 14209–14213 (1995).
34. Starr, D. A. *et al.* *unc-83* encodes a novel component of the nuclear envelope and is essential for proper nuclear migration. *Development* **128**, 5039–5050 (2001).
35. Grigoriev, I. *et al.* Rab6 Regulates Transport and Targeting of Exocytotic Carriers. *Dev Cell* **13**, 305–314 (2007).
36. Martinez-Carrera, L. A. & Wirth, B. Dominant spinal muscular atrophy is caused by mutations in BICD2, an important golgin protein. *Front Neurosci* **9**, 401 (2015).
37. Neveling, K. *et al.* Mutations in BICD2, which encodes a golgin and important motor adaptor, cause congenital autosomal-dominant spinal muscular atrophy. *Am J Hum Gen* **92**, 946–954 (2013).

38. Peeters, K. *et al.* Molecular defects in the motor adaptor BICD2 cause proximal spinal muscular atrophy with autosomal-dominant inheritance. *Am. J. Hum. Genet.* **92**, 955–964 (2013).
39. Synofzik, M., Martinez-Carrera, L. A., Lindig, T., Schöls, L. & Wirth, B. Dominant spinal muscular atrophy due to BICD2: A novel mutation refines the phenotype. *J Neurol Neurosurg Psychiatry* **85** 590–592 (2014).
40. Tsai, M.-H. *et al.* Impairment in dynein-mediated nuclear translocation by BICD2 C-terminal truncation leads to neuronal migration defect and human brain malformation. *Acta Neuropathol. Commun.* **8**, 106 (2020).
41. Meijboom, E. K., Wood, J. M. & McClorey, G. Splice-switching therapy for spinal muscular atrophy. *Genes* **8**, doi:10.3390/genes8060161 (2017).
42. Celestino, R. *et al.* A transient helix in the disordered region of dynein light intermediate chain links the motor to structurally diverse adaptors for cargo transport. *PLoS Biol* **17**, e3000100 (2019).
43. Lee, I.-G., Cason, S. E., Alqassim, S. S., Holzbaur, E. L. F. & Dominguez, R. A tunable LIC1-adaptor interaction modulates dynein activity in a cargo-specific manner. *Nat Commun* **11**, 5695 (2020).
44. Henen, M. A. *et al.* The Disordered Spindly C-terminus Interacts with RZZ Subunits ROD-1 and ZWL-1 in the Kinetochores through the Same Sites in *C. Elegans*. *J. Mol. Biol.* **433**, (2021).
45. Ward, J. J., Sodhi, J. S., McGuffin, L. J., Buxton, B. F. & Jones, D. T. Prediction and functional analysis of native disorder in proteins from the three kingdoms of life. *J Mol Biol* **337**, 635–645 (2004).
46. Lee, I.-G. *et al.* A conserved interaction of the dynein light intermediate chain with dynein-dynactin effectors necessary for processivity. *Nat Commun* **9**, 986 (2018).
47. Milles, S. *et al.* Plasticity of an ultrafast interaction between nucleoporins and nuclear transport receptors. *Cell* **163**, 734–745 (2015).
48. Hoang, H. T., Schlager, M. A., Carter, A. P. & Bullock, S. L. DYNC1H1 mutations associated with neurological diseases compromise processivity of dynein–dynactin–cargo adaptor complexes. *Proc. Natl. Acad. Sci. U. S. A.* **114**, E1597–E1606 (2017).
49. Cai, Y., Singh, B. B., Aslanukov, A., Zhao, H. & Ferreira, P. A. The Docking of Kinesins, KIF5B and KIF5C, to Ran-binding Protein 2 (RanBP2) Is Mediated via a Novel RanBP2 Domain. *J Biol Chem* **276**, 41594–41602 (2001).
50. Cui, H. *et al.* Adapter Proteins for Opposing Motors Interact Simultaneously with Nuclear Pore Protein Nup358. *Biochemistry* **58**, 5085–5097. PMID: PMC7243271. (2019).
51. Dodding, M. P., Mitter, R., Humphries, A. C. & Way, M. A kinesin-1 binding motif in vaccinia virus that is widespread throughout the human genome. *EMBO J* **30**, 4523–4538 (2011).
52. Doobin, D. J., Kemal, S., Dantas, T. J. & Vallee, R. B. Severe NDE1-mediated microcephaly results from neural progenitor cell cycle arrests at multiple specific stages. *Nat. Comm* **7**, 12551 10.1038/ncomms12551 (2016).
53. Pernigo, S., Lamprecht, A., Steiner, R. A. & Dodding, M. P. Structural basis for kinesin-1: cargo recognition. *Science* **340**, 356–359 (2013).
54. Noell, C. R. *et al.* A Quantitative Model for BicD2/Cargo Interactions. *Biochemistry* **57**, 6538–6550 (2018).
55. Kremontsova, E. B., Furuta, K., Oiwa, K., Trybus, K. M. & Ali, M. Y. Small teams of myosin Vc motors coordinate their stepping for efficient cargo transport on actin bundles.

- J Biol Chem* **292**, 10998–11008 (2017).
56. Kay, L. E., Ikura, M., Tschudin, R. & Bax, A. Three-dimensional triple-resonance NMR spectroscopy of isotopically enriched proteins. *J. Magn. Reson.* **89**, 496–514 (1990).
  57. Clubb, R. T., Thanabal, V. & Wagner, G. A constant-time three-dimensional triple-resonance pulse scheme to correlate intraresidue <sup>1</sup>HN, <sup>15</sup>N, and <sup>13</sup>C' chemical shifts in <sup>15</sup>N<sup>13</sup>C-labelled proteins. *J. Magn. Reson.* **97**, 213–217 (1992).
  58. Grzesiek, S. & Bax, A. An efficient experiment for sequential backbone assignment of medium-sized isotopically enriched proteins. *J. Magn. Reson.* **99**, 201–207 (1992).
  59. Grzesiek, S. & Bax, A. Correlating Backbone Amide and Side Chain Resonances in Larger Proteins by Multiple Relayed Triple Resonance NMR. *J. Am. Chem. Soc.* **114**, 6291–6293 (1992).
  60. Vallurupalli, P., Bouvignies, G. & Kay, L. E. Studying 'invisible' excited protein states in slow exchange with a major state conformation. *J. Am. Chem. Soc.* **134**, 8148–8161 (2012).
  61. Charlier, C. *et al.* Structure and Dynamics of an Intrinsically Disordered Protein Region That Partially Folds upon Binding by Chemical-Exchange NMR. *J. Am. Chem. Soc.* **139**, 12219–12227 (2017).
  62. Beckwith, M. A., Erazo-Colon, T. & Johnson, B. A. RING NMR dynamics: software for analysis of multiple NMR relaxation experiments. *J. Biomol. NMR* (2020) doi:10.1007/s10858-020-00350-w.
  63. Wishart, D. S. Interpreting Protein Chemical Shift Data. *Prog. Nucl. Magn. Reson. Spectrosc.* **58**, 62–87 (2011).
  64. Cui, H. *et al.* Coiled-coil registry shifts in the F684I mutant of Bicaudal D result in cargo-independent activation of dynein motility. *Traffic* **21**, 463–478. DOI: 10.1111/tra.12734. PMID: PMC7437983 (2020).
  65. Rambo, R. P. & Tainer, J. A. Accurate assessment of mass, models and resolution by small-angle scattering. *Nature* **496**, 477–481 (2013).
  66. Dharan, A. *et al.* Bicaudal D2 facilitates the cytoplasmic trafficking and nuclear import of HIV-1 genomes during infection. *Proc. Natl. Acad. Sci. U. S. A.* **114**, E10707–E10716 (2017).
  67. Lee Sweeney, H. & Holzbaur, E. L. F. Motor proteins. *Cold Spring Harb. Perspect. Biol.* **10**, (2018).
  68. Bergbrede, T. *et al.* Biophysical analysis of the interaction of Rab6a GTPase with its effector domain. *J. Biol. Chem.* **284**, 2628–2635 (2009).
  69. Bergbrede, T., Pylypenko, O., Rak, A. & Alexandrov, K. Structure of the extremely slow GTPase Rab6A in the GTP bound form at 1.8Å resolution. *J. Struct. Biol.* **152**, 235–238 (2005).
  70. Eathiraj, S., Pan, X., Ritacco, C. & Lambright, D. G. Structural basis of family-wide Rab GTPase recognition by rabenosyn-5. *Nature* **436**, 415–419 (2005).
  71. Schlager, M. A., Hoang, H. T., Urnavicius, L., Bullock, S. L. & Carter, A. P. *In vitro* reconstitution of a highly processive recombinant human dynein complex. *EMBO J.* **33**, 1855–1868 (2014).
  72. Tai, A. W., Chuang, J. Z., Bode, C., Wolfrum, U. & Sung, C. H. Rhodopsin's carboxy-terminal cytoplasmic tail acts as a membrane receptor for cytoplasmic dynein by binding to the dynein light chain Tctex-1. *Cell* **97**, 877–887 (1999).
  73. Sanger, A. *et al.* SKIP controls lysosome positioning using a composite kinesin-1 heavy and light chain-binding domain. *J. Cell Sci.* **130**, 1637–1651 (2017).

74. Blasius, T. L., Cai, D., Jih, G. T., Toret, C. P. & Verhey, K. J. Two binding partners cooperate to activate the molecular motor Kinesin-1. *J. Cell Biol.* **176**, 11–17 (2007).
75. Cockburn, J. J. B. *et al.* Insights into Kinesin-1 Activation from the Crystal Structure of KLC2 Bound to JIP3. *Struct.* **26**, 1486-1498.e6 (2018).
76. Feng, Q., Gicking, A. M. & Hancock, W. O. Dynactin p150 promotes processive motility of DDB complexes by minimizing diffusional behavior of dynein. *Mol Biol Cell* **31**, 782–792 (2020).
77. Roberts, A. J., Goodman, B. S. & Reck-Peterson, S. L. Reconstitution of dynein transport to the microtubule plus end by kinesin. *Elife* **3**, e02641–e02641 (2014).
78. Gross, S. P., Guo, Y., Martinez, J. E. & Welte, M. A. A Determinant for Directionality of Organelle Transport in Drosophila Embryos. *Curr. Biol.* **13**, 1660–1668 (2003).
79. Derr, N. D. *et al.* Tug-of-war in motor protein ensembles revealed with a programmable DNA origami scaffold. *Science* **338**, 662–665 (2012).
80. Ally, S., Larson, A. G., Barlan, K., Rice, S. E. & Gelfand, V. I. Opposite-polarity motors activate one another to trigger cargo transport in live cells. *J. Cell Biol.* **187**, 1071–1082 (2009).
81. Kendrick, A. A. *et al.* Hook3 is a scaffold for the opposite-polarity microtubule-based motors cytoplasmic dynein-1 and KIF1C. *J. Cell Biol.* **218**, 2982–3001 (2019).
82. Furuta, K. *et al.* Measuring collective transport by defined numbers of processive and nonprocessive kinesin motors. *Proc. Natl. Acad. Sci. U. S. A.* **110**, 501–506 (2013).
83. Belyy, V. *et al.* The mammalian dynein-dynactin complex is a strong opponent to kinesin in a tug-of-war competition. *Nat. Cell Biol.* **18**, 1018–1024 (2016).
84. Schneider, C. A., Rasband, W. S. & Eliceiri, K. W. NIH Image to ImageJ: 25 years of image analysis. *Nat Meth* **9**, 671–675 (2012).
85. Panchal, S. C., Bhavesh, N. S. & Hosur, R. V. Improved 3D triple resonance experiments, HNN and HN(C)N, for HN and 15N sequential correlations in (13C, 15N) labeled proteins: Application to unfolded proteins. *J. Biomol. NMR* **20**, 135–147 (2001).
86. Delaglio, F. *et al.* NMRPipe: A multidimensional spectral processing system based on UNIX pipes. *J. Biomol. NMR* **6**, 277–293 (1995).
87. Ying, J., Delaglio, F., Torchia, D. A. & Bax, A. Sparse multidimensional iterative lineshape-enhanced (SMILE) reconstruction of both non-uniformly sampled and conventional NMR data. *J. Biomol. NMR* **68**, 101–118 (2017).
88. Lee, W., Tonelli, M. & Markley, J. L. NMRFAM-SPARKY: Enhanced software for biomolecular NMR spectroscopy. *Bioinformatics* **31**, 1325–1327 (2015).
89. Lee, W. *et al.* Data and text mining PINE-SPARKY: graphical interface for evaluating automated probabilistic peak assignments in protein NMR spectroscopy. *Bioinforma. Appl. NOTE* **25**, 2085–2087 (2009).
90. Lee, W. *et al.* I-PINE web server: an integrative probabilistic NMR assignment system for proteins. *J. Biomol. NMR* **73**, 213–222 (2019).
91. Yuwen, T., Kay, L. E. & Bouvignies, G. Dramatic Decrease in CEST Measurement Times Using Multi-Site Excitation. *ChemPhysChem* **19**, 1707–1710 (2018).
92. Yuwen, T., Bouvignies, G. & Kay, L. E. Exploring methods to expedite the recording of CEST datasets using selective pulse excitation. *J. Magn. Reson.* **292**, 1–7 (2018).
93. Zhao, J. *et al.* EGCG binds intrinsically disordered N-terminal domain of p53 and disrupts p53-MDM2 interaction. *Nat. Commun.* **12**, (2021).
94. Hopkins, J. B., Gillilan, R. E. & Skou, S. BioXTAS RAW: Improvements to a free open-source program for small-angle X-ray scattering data reduction and analysis. *J. Appl.*

- Crystallogr.* **50**, 1545–1553 (2017).
95. Hajizadeh, N. R., Franke, D., Jeffries, C. M. & Svergun, D. I. Consensus Bayesian assessment of protein molecular mass from solution X-ray scattering data. *Sci. Rep.* **8**, 1–13 (2018).
  96. Konarev, P. V., Volkov, V. V., Sokolova, A. V., Koch, M. H. J. & Svergun, D. I. *PRIMUS*: a Windows PC-based system for small-angle scattering data analysis. *J. Appl. Crystallogr.* **36**, 1277–1282 (2003).
  97. Mylonas, E. & Svergun, D. I. Accuracy of molecular mass determination of proteins in solution by small-angle X-ray scattering. *J. Appl. Crystallogr.* **40**, s245–s249 (2007).
  98. Trewhella, J. *et al.* 2017 publication guidelines for structural modelling of small-angle scattering data from biomolecules in solution: an update. *Acta Crystallogr. Sect. D Struct. Biol.* **73**, 710–728 (2017).
  99. Svergun, D. I. Determination of the regularization parameter in indirect-transform methods using perceptual criteria. *J. Appl. Crystallogr.* **25**, 495–503 (1992).
  100. Franke, D. *et al.* ATSAS 2.8: a comprehensive data analysis suite for small-angle scattering from macromolecular solutions. *J Appl Cryst* **50**, 1212–1225 (2017).
  101. Franke, D. & Svergun, D. I. DAMMIF, a program for rapid ab-initio shape determination in small-angle scattering. *J Appl Cryst* **42**, 342–346 (2009).
  102. Volkov, V. V. & Svergun, D. I. Uniqueness of ab initio shape determination in small-angle scattering. *J. Appl. Crystallogr.* **36**, 860–864 (2003).
  103. Svergun, D. I. Restoring low resolution structure of biological macromolecules from solution scattering using simulated annealing. *Biophys. J.* **76**, 2879–2886 (1999).
  104. Pettersen, E. F. *et al.* UCSF Chimera - A visualization system for exploratory research and analysis. *J. Comput. Chem.* **25**, 1605–1612 (2004).
  105. Sckolnick, M., Kremntsova, E. B., Warshaw, D. M. & Trybus, K. M. More than just a cargo adapter, melanophilin prolongs and slows processive runs of myosin Va. *J Biol Chem* **288**, 29313–29322 (2013).

### Author Contributions:

JMG, HC and MYA contributed equally to this work and should be cited as co-first authors. JMG, JZ, and CW performed the NMR experiments. HC and SRS purified the proteins, and performed CD and SAXS experiments, analyzed the data and made the figures. XZ purified proteins, performed gel-based pulldown assays, analyzed the data, and made the figures. MYA performed all the TIRF experiments. EWD performed the ITC experiments, analyzed the data, and made the figures. CW and SRS designed experiments and JMG, CW, MYA, KT and SRS analyzed the data, and wrote and edited the manuscript.

### Acknowledgements:

We thank for Fabien Ferrage, Guillaume Bouvignies and Philippe Pelupessy for help with the CEST experiments and Bruce Johnson for help with fitting of the CEST data. We thank Michael Cosgrove for helpful discussions regarding SAXS. CW is funded by NIH grants CA206592 and AG069039. SRS is funded by NIH grant R15 GM128119 and additional funds came from the Research Foundation of SUNY. KMT was funded by NIH grant R35 GM136288. MYA was funded by NIH grant R03 NS114115. The CD instrument was supported by NIGMS

grants 1R01GM125853-02S1 and 3R35GM130207-01S1. SAXS data was collected at beamline 7A1, Cornell High Energy Synchrotron source, supported by NSF award DMR-1829070, and by NIH/NIGMS award GM-124166. We thank Qingqiu Huang and Richard Gillilan for user support at the synchrotron source. We also thank Patty Fagnant, Carol Bookwalter and Elena Krementsova for cloning, protein expression and protein purification. The authors declare that they have no conflicting interests.
